# Supplementary material for: Organocatalysts with carbon-centered activity for CO2 reduction with boranes
Source: Royal Society of Chemistry journal article supplement (doi:10.1039/c5cc04337a), 2015-01-01
Supplement: c5cc04337a1.pdf [file c5cc04337a1.pdf]

## **Organocatalysts with carbon-centered activity for CO<sub>2</sub> reduction with boranes**

Yanxin Yang, Maotong Xu and Datong Song\*

Davenport Chemical Research Laboratories, Department of Chemistry, University of Toronto, 80 St. George Street,  
Toronto, Ontario, M5S 3H6, Canada

E-mail: [dsong@chem.utoronto.ca](mailto:dsong@chem.utoronto.ca)

## Table of content

|                                                                                                                                   |              |
|-----------------------------------------------------------------------------------------------------------------------------------|--------------|
| 1. General considerations and synthetic route to <b>2</b>                                                                         | page S3      |
| 2. Synthesis and characterizations of <b>A</b>                                                                                    | page S4      |
| 3. Synthesis and characterizations of <b>B</b>                                                                                    | page S5      |
| 4. Synthesis and characterizations of <b>C</b>                                                                                    | page S6      |
| 5. Synthesis and characterizations of <b>D</b>                                                                                    | page S7      |
| 6. Synthesis and characterizations of <b>2</b>                                                                                    | page S8      |
| 7. Synthesis, characterization and reactivity of <b>3</b>                                                                         | page S9-S11  |
| 8. Reaction between $^{13}\text{CO}_2$ and 9-BBN catalyzed by <b>1</b>                                                            | page S12     |
| 9. Reaction between $^{13}\text{CO}_2$ and HBcat catalyzed by <b>1</b>                                                            | page S13     |
| 9. Catalytic hydroboration of $\text{CO}_2$ by 9-BBN, HBcat, HBpin and $\text{BH}_3\cdot\text{SMe}_2$ using <b>1</b> as catalyst  | page S14-S21 |
| 10. Catalytic hydroboration of $\text{CO}_2$ by 9-BBN, HBcat, HBpin and $\text{BH}_3\cdot\text{SMe}_2$ using <b>2</b> as catalyst | page S22-S26 |
| 11. Reference                                                                                                                     | page S26     |

## General Considerations

The syntheses of **A–D**, **2**, and **3** were done in air. All manipulations involving boranes were carried out under a dinitrogen atmosphere using a glovebox or Schlenk techniques. Compound **1**<sup>1</sup> and intermediates **A–C**<sup>2</sup> were prepared using modified literature methods. Compounds **2**, **3** and intermediate **D** are new compounds. All other chemicals were purchased from commercial source. All glassware was dried overnight in a 150 °C oven or by flame before use. The J. Young NMR tubes were dried in a 60 °C oven overnight. Catalytic reactions under 1.5 atm of CO<sub>2</sub> were conducted in sealed Schlenk bombs. CO<sub>2</sub> was purchased from Linde (Grade 4.0) and used as received. THF was dried over Na/benzophenone and distilled under dinitrogen before use. CH<sub>2</sub>Cl<sub>2</sub>, Et<sub>2</sub>O, toluene, pentane, and hexanes were dried by passing through a Pure Solv InnovativeTechnology Grubbs-type solvent purification system and degassed through three freeze–pump–thaw cycles. DMSO-d<sub>6</sub> was dried with CaH<sub>2</sub> at 60 °C overnight, vacuum distilled and stored over molecular sieves. CDCl<sub>3</sub> was dried with P<sub>2</sub>O<sub>5</sub> at 60 °C overnight, distilled under dinitrogen and stored over molecular sieves. C<sub>6</sub>D<sub>6</sub> and C<sub>6</sub>D<sub>5</sub>Br were degassed through three freeze–pump–thaw cycles and dried over molecular sieves. <sup>1</sup>H, <sup>11</sup>B, and <sup>13</sup>C NMR data were collected on a Varian 400 MHz, Bruker Avance III 400 MHz, Agilent DD2–500 MHz or Agilent DD2–600 MHz NMR spectrometer. The chemical shifts were reported in ppm and referenced with the residual solvent signals. gHSQC, gCOSY and gHMBC NMR experiments were performed to assign signals properly. Elemental analyses were performed by ANALEST in our department at the University of Toronto. The commercial HBcat was vacuum-distilled at 50 °C. The purity of the redistilled HBcat was determined by <sup>1</sup>H NMR with hexamethylbenzene as the internal standard to be ranging from 65% to 70% between batches. The measured purity of HBcat is specified in each individual experiment below.

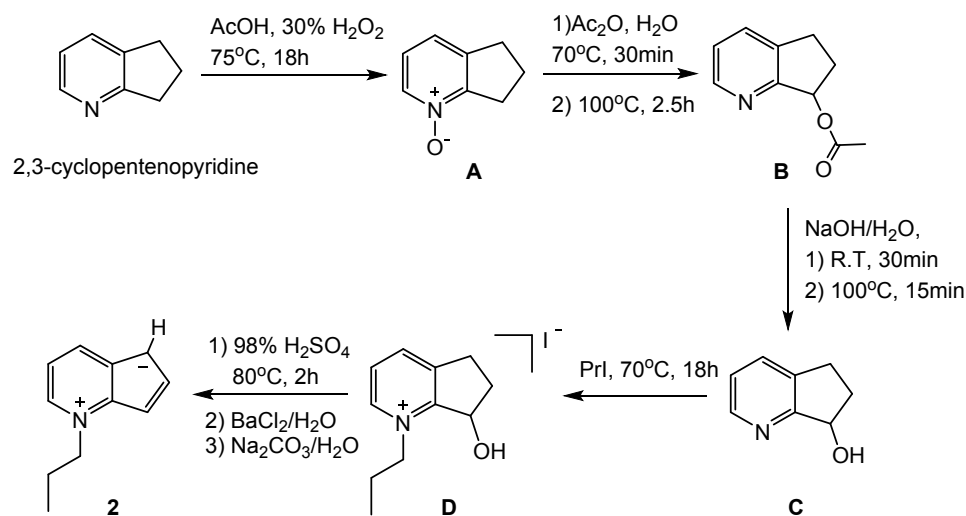

Scheme S1. Synthesis of compound **2**

### Synthesis of A:

2,3-Cyclopentenopyridine (5.0 g, 0.037 mol), acetic acid (25 mL, 0.437 mol), and 30% H<sub>2</sub>O<sub>2</sub> (4.15 mL, 0.0411 mol) were combined in a round bottom flask and heated at 75 °C for 18 h, during which 30% H<sub>2</sub>O<sub>2</sub> (3.35 mL, 0.0332 mol) was added at 3 h. The solution gradually changed color from pale brown to pale yellow. Volatiles were removed on a rotary evaporator. The remaining dark brown liquid was transferred into a K<sub>2</sub>CO<sub>3</sub> aqueous solution (12 g of K<sub>2</sub>CO<sub>3</sub> in 90 mL of H<sub>2</sub>O), which was then extracted with CH<sub>2</sub>Cl<sub>2</sub> (400 mL x 3). The combined CH<sub>2</sub>Cl<sub>2</sub> layer was washed with brine and dried over MgSO<sub>4</sub>. The removal of CH<sub>2</sub>Cl<sub>2</sub> gave **A** as a white solid (4.6 g, 82% yield). <sup>1</sup>H NMR (CDCl<sub>3</sub>, 500 MHz) δ: 7.83 (dd, J = 6.3, 1.0 Hz, 1H, H1), 6.94 (dd, J = 7.6, 1.3 Hz, 1H, H3), 6.89 (dd, J = 7.6, 6.4 Hz, 1H, H2), 2.95 (t, J = 7.7 Hz, 2H, H6), 2.83 (t, J = 7.7 Hz, 2H, H4), 2.0 (quintet, J = 8.75 Hz, 2H, H5). <sup>13</sup>C NMR (CDCl<sub>3</sub>, 125 MHz) δ: 152.73(C7), 141.99(C8), 136.9(C1), 123.62(C2), 122.38(C3), 31.29(C4), 29.23(C6), 21.72(C5).

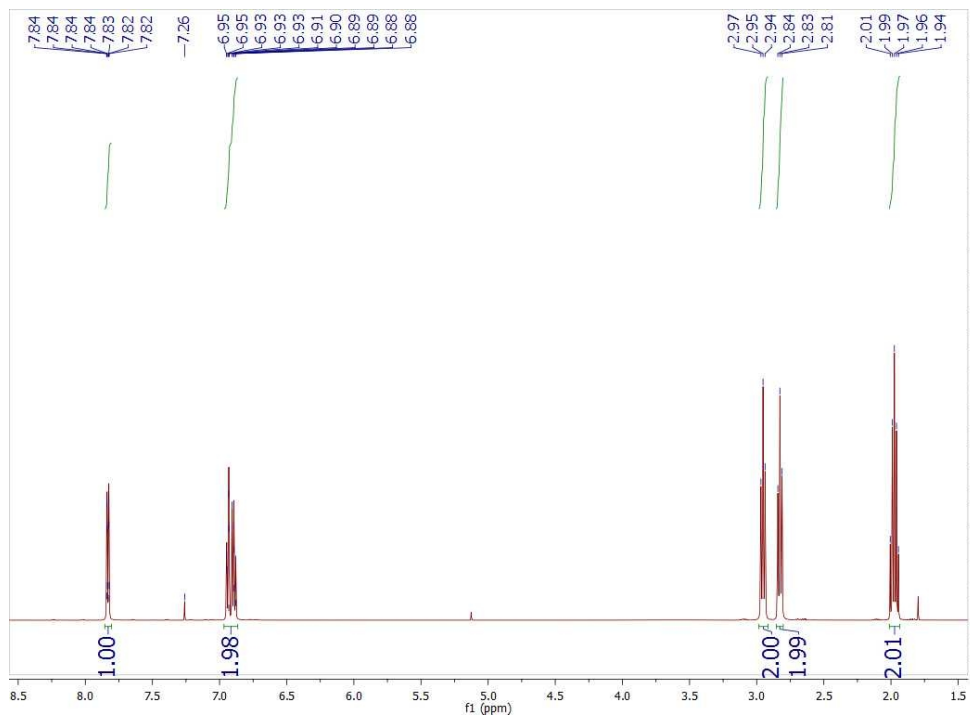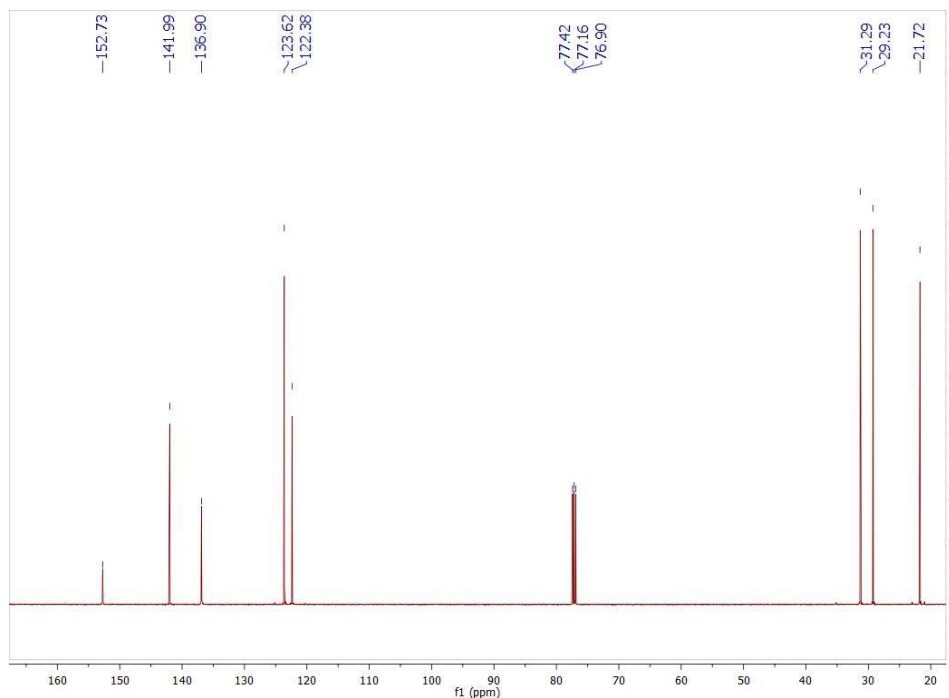

### Synthesis of B:

**A** (4.6 g, 0.034 mol), H<sub>2</sub>O (0.3 mL, 5.4 mmol), and acetic anhydride (34 mL, 0.36 mol) were mixed in 100 mL round bottom flask. The pink solution was stirred at room temperature for 30 min and then heated at 70 °C for 30 min. The colour of the solution gradually turned to dark purple. The solution was then heated at 100 °C for 2.5 h. Volatiles were removed on a rotary evaporator. The remaining black oil was added to a K<sub>2</sub>CO<sub>3</sub> aqueous solution (10 g of K<sub>2</sub>CO<sub>3</sub> in 70 mL of H<sub>2</sub>O), which was then extracted with CH<sub>2</sub>Cl<sub>2</sub> (500 mL x 3). The combined CH<sub>2</sub>Cl<sub>2</sub> layer was washed with brine and dried over MgSO<sub>4</sub>. The removal of CH<sub>2</sub>Cl<sub>2</sub> gave **B** as a brown oil (80.4% yield). <sup>1</sup>H NMR (CDCl<sub>3</sub>, 500 MHz) δ: 8.51 (d, J = 4.2 Hz, 1H, H1), 7.60 (dd, J = 7.7, 0.6 Hz, 1H, H3), 7.19 (dd, J = 7.7, 4.9 Hz, 1H, H2), 6.13 (dd, J = 7.5, 5.0 Hz, 1H, H6), 3.07 (m, 1H, H4), 2.89 (m, 1H, H4'), 2.65 (m, 1H, H5), 2.12 (s, 3H, H10), 2.05 (m, 1H, H5'). <sup>13</sup>C NMR (CDCl<sub>3</sub>, 125 MHz) δ: 170.88(C9), 160.53(C7), 148.95(C1), 137.46(C8), 133.17(C3), 123.41(C2), 77.32(C6), 30.85(C5), 27.87(C4), 21.31(C10).

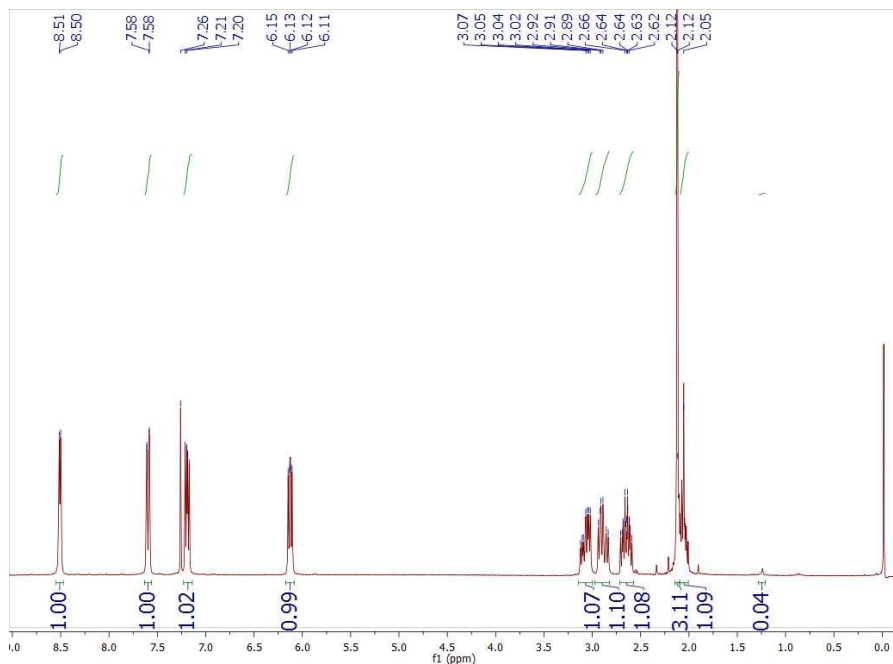

Figure S3. <sup>1</sup>H NMR spectrum of **B** in CDCl<sub>3</sub>

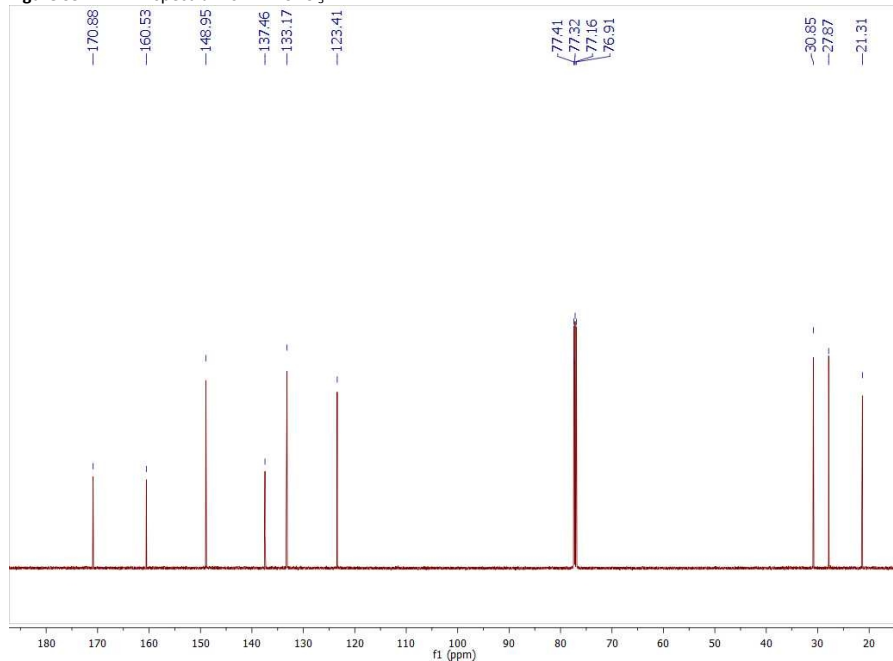

Figure S4. <sup>13</sup>C NMR spectrum of **B** in CDCl<sub>3</sub>

### Synthesis of C:

**B** (7.05 g, 0.0398 mol) and NaOH (2.15 g, 0.0538 mol) were mixed with 19.4 mL of H<sub>2</sub>O in a 50 mL round bottom flask. The solution was stirred at room temperature for 30 min and then heated at 100 °C for 15 min. The dark solution was cooled down and added to a K<sub>2</sub>CO<sub>3</sub> aqueous solution (20 g of K<sub>2</sub>CO<sub>3</sub> in 300 mL of H<sub>2</sub>O), which was then extracted with CH<sub>2</sub>Cl<sub>2</sub> (830 mL x 3). The combined CH<sub>2</sub>Cl<sub>2</sub> layer was washed with brine and dried over MgSO<sub>4</sub>. The removal of CH<sub>2</sub>Cl<sub>2</sub> on a rotary evaporator gave the crude product as a brown solid. Recrystallization from cyclohexane gave pure **C** as a pale-yellow solid (4.61 g, 86.3% yield). <sup>1</sup>H NMR (CDCl<sub>3</sub>, 500 MHz) δ: 8.42 (d, J = 4.8 Hz, 1H, H1), 7.58 (dd, J = 7.6, 1.3 Hz, 1H, H3), 7.15 (dd, J = 7.6, 4.9 Hz, 1H, H2), 5.26 (dd, J = 7.4, 6.1 Hz, 1H, H6), 4.98 (s, 1H, OH), 3.06 (ddd, J = 16.2, 8.9, 4.1 Hz, 1H, H4), 2.83 (m, 1H, H4'), 2.56 (m, 1H, H5), 2.07 (dddd, J = 13.3, 8.9, 7.2, 6.1 Hz, 1H, H5'). <sup>13</sup>C NMR (CDCl<sub>3</sub>, 125 MHz) δ: 164.99(C7), 147.78(C1), 136.72(C8), 133.67(C3), 122.90(C2), 74.42(C6), 32.95(C5), 27.65(C4).

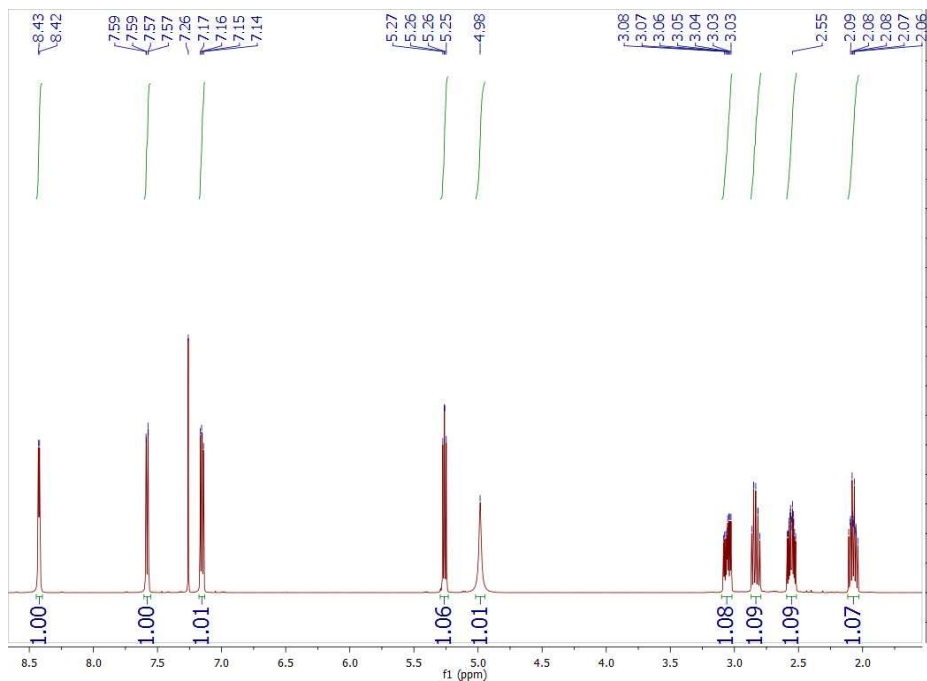

Figure S5. <sup>1</sup>H NMR spectrum of **C** in CDCl<sub>3</sub>

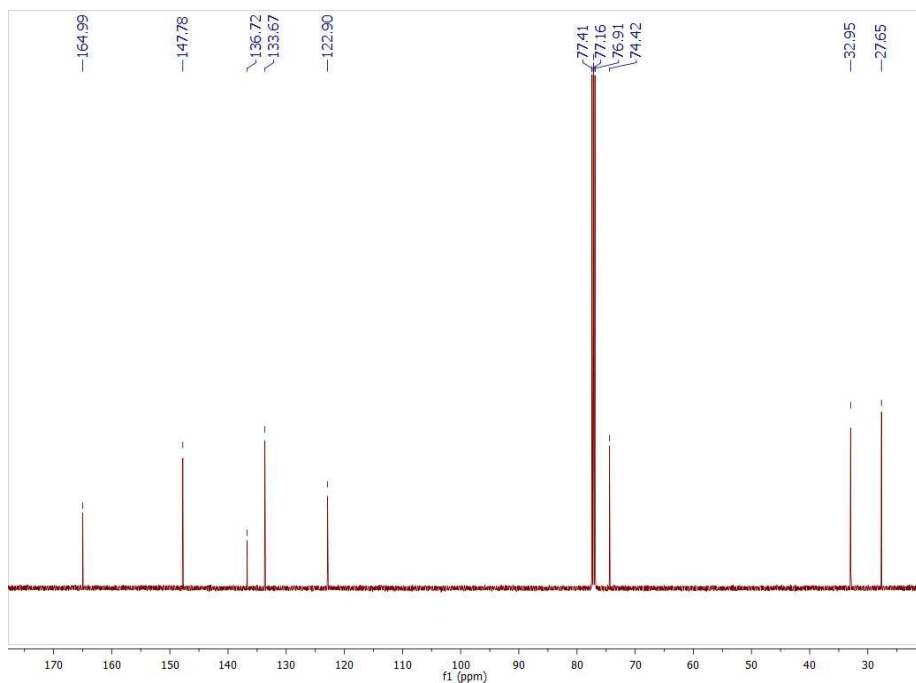

Figure S6. <sup>13</sup>C NMR spectrum of **C** in CDCl<sub>3</sub>

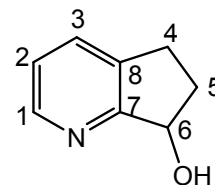

### Synthesis of D:

**C** (0.56 g, 4.1 mmol) and 1-iodopropane (3 mL, 0.0274 mol) were mixed in a 25 mL round bottom flask, and heated at 70°C for 18 hours. When the reaction was complete, the colorless liquid phase turned yellow, which was decanted. The residual black-brown solid in the flask was ground and washed with 20 mL of cyclohexane. The solid was then dissolved in 300 mL of CH<sub>2</sub>Cl<sub>2</sub>. The resulting solution was dried over MgSO<sub>4</sub>. The removal of CH<sub>2</sub>Cl<sub>2</sub> gave **D** as a brown solid (1.13 g, 83.9% yield). <sup>1</sup>H NMR (CD<sub>3</sub>CN, 500 MHz) δ: 8.60 (dd, J = 6.1, 0.6 Hz, 1H, H4), 8.31 (dd, J = 7.8, 1.0 Hz, 1H, H6), 7.84 (dd, J = 7.6, 6.3 Hz, 1H, H5), 5.62 (d, J = 4.7 Hz, 1H, H9), 4.96 (d, J = 6.9 Hz, 1H, OH), 4.76 (ddd, J = 13.0, 8.8, 6.7 Hz, 1H, H3), 4.55 (ddd, J = 13.0, 8.9, 6.8 Hz, 1H, H3'), 3.26 (ddd, J = 9.0, 5.7 Hz, 1H, H7), 3.01 (ddd, J = 9.0, 5.6 Hz, 1H, H7'), 2.58 (m, 1H, H8), 2.19 (m, 1H, H8'), 2.0 (m, 2H, H2), 0.99 (t, J = 7.4 Hz, 3H). <sup>13</sup>C NMR (CD<sub>3</sub>CN, 125 MHz) δ: 159.55(C10), 146.27(C11), 143.75(C4), 143.10(C6), 127.99(C5), 72.86(C9), 59.49(C3), 33.81(C8), 28.92(C7), 25.09(C2), 10.91(C1).

Anal. calcd for (C<sub>11</sub>H<sub>16</sub>NOI): C 43.29, H 5.25, N 4.59; Found: C 43.40, H 5.05, N 4.46.

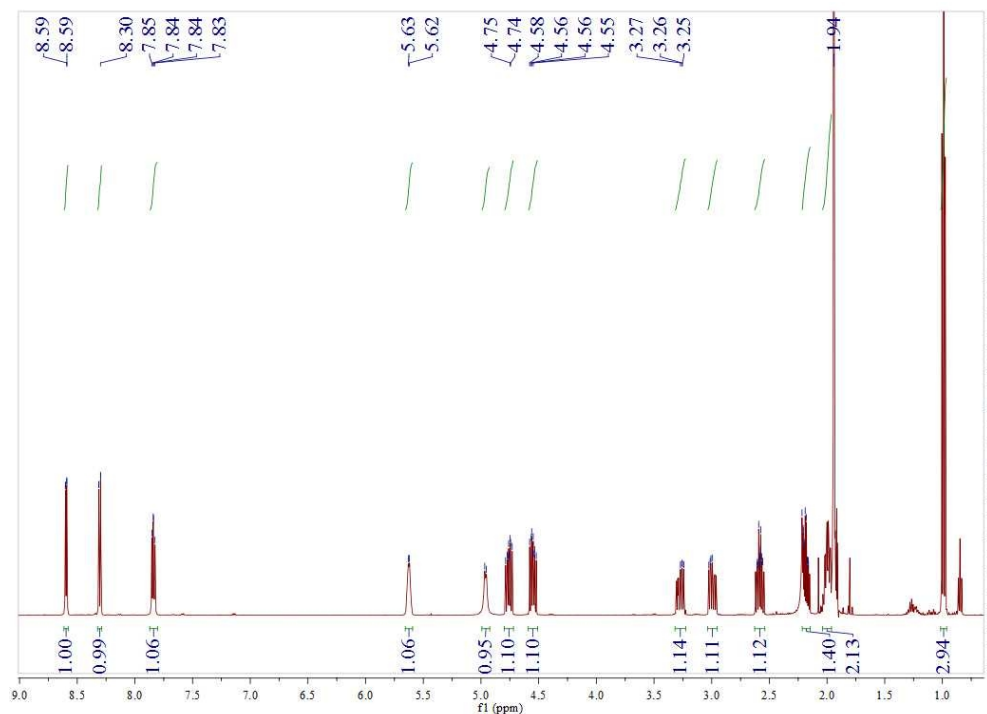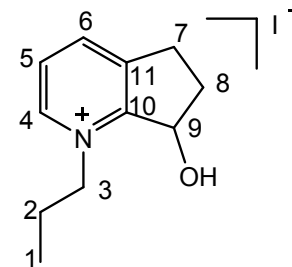

Figure S7. <sup>1</sup>H NMR spectrum of **D** in CD<sub>3</sub>CN

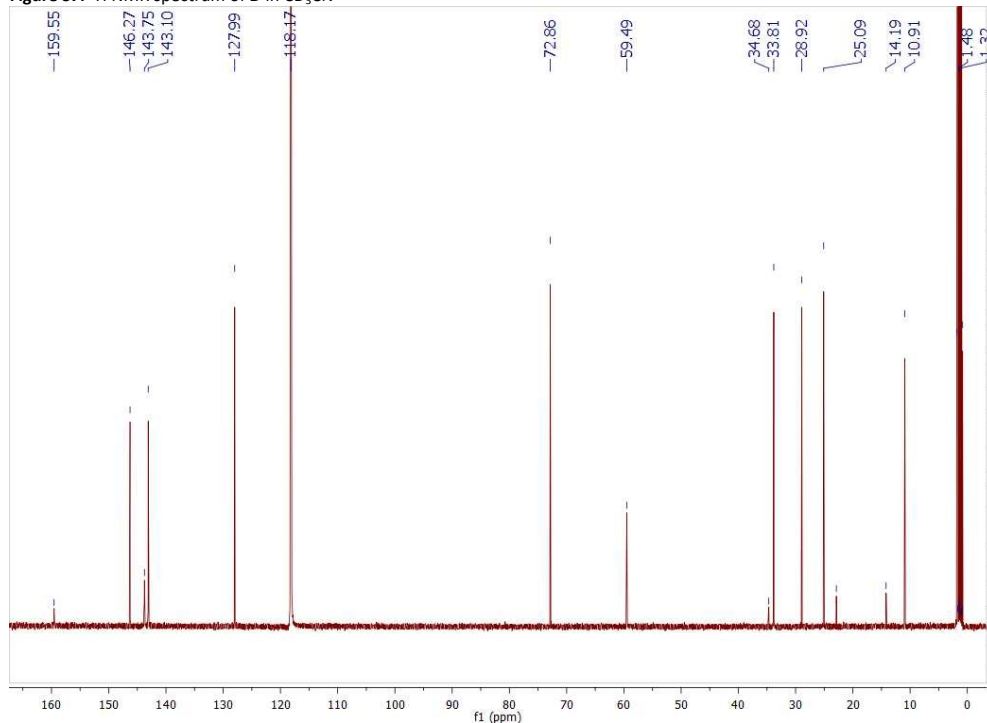

Figure S8. <sup>13</sup>C NMR spectrum of **D** in CD<sub>3</sub>CN

### Synthesis of 2:

**D** (0.33 g, 1.08 mmol) and 98% H<sub>2</sub>SO<sub>4</sub> (0.356 mL, 6.5 mmol) were mixed in a 25 mL round bottom flask and heated at 60 °C for 2 h. The solution was cooled down followed by the addition of 10 mL of water. The solid iodine was removed through vacuum filtration. To the filtrate was added a solution of BaCl<sub>2</sub>·2H<sub>2</sub>O (1.69 g in 10 mL of H<sub>2</sub>O). The white precipitate was filtered off. The resulting pale-brown aqueous filtrate was washed with 80 mL of CH<sub>2</sub>Cl<sub>2</sub> and added dropwise to a solution of Na<sub>2</sub>CO<sub>3</sub> (2.2 g in 10 mL of H<sub>2</sub>O). The colorless transparent Na<sub>2</sub>CO<sub>3</sub> solution turned into bright orange suspension immediately. The product was extracted with CH<sub>2</sub>Cl<sub>2</sub> (200 mL x 3). The CH<sub>2</sub>Cl<sub>2</sub> layer was dried over MgSO<sub>4</sub>. The removal of CH<sub>2</sub>Cl<sub>2</sub> gave pure **2** as an orange oil (0.17 g, 94.3% yield). <sup>1</sup>H NMR (CDCl<sub>3</sub>, 500 MHz) δ: 8.01 (d, J = 7.4 Hz, 1H, H6), 7.43 (d, J = 6.1 Hz, 1H, H4), 7.39 (dd, J = 4.3, 4.3 Hz, 1H, H8), 6.62 (dd, J = 7.4, 6.1 Hz, 1H, H5), 6.54 (dd, J = 4.3, 1.5 Hz, 1H, H7), 6.18 (m, 1H, H9), 4.33 (t, J = 7.4 Hz, 2H, H3), 2.11 (qt, J = 7.4, 5.5 Hz, 2H, H2), 1.02 (t, J = 7.4 Hz, 3H, H1). <sup>13</sup>C NMR (CDCl<sub>3</sub>, 125 MHz) δ: 133.59(C10), 130.4(C11), 129.24(C8), 129.13(C6), 128.97(C4), 105.29(C5), 99.58(C7), 88.54(C9), 57.77(C3), 21.90(C2), 11.58(C1). ESI-MS: 159.83 [M+1].

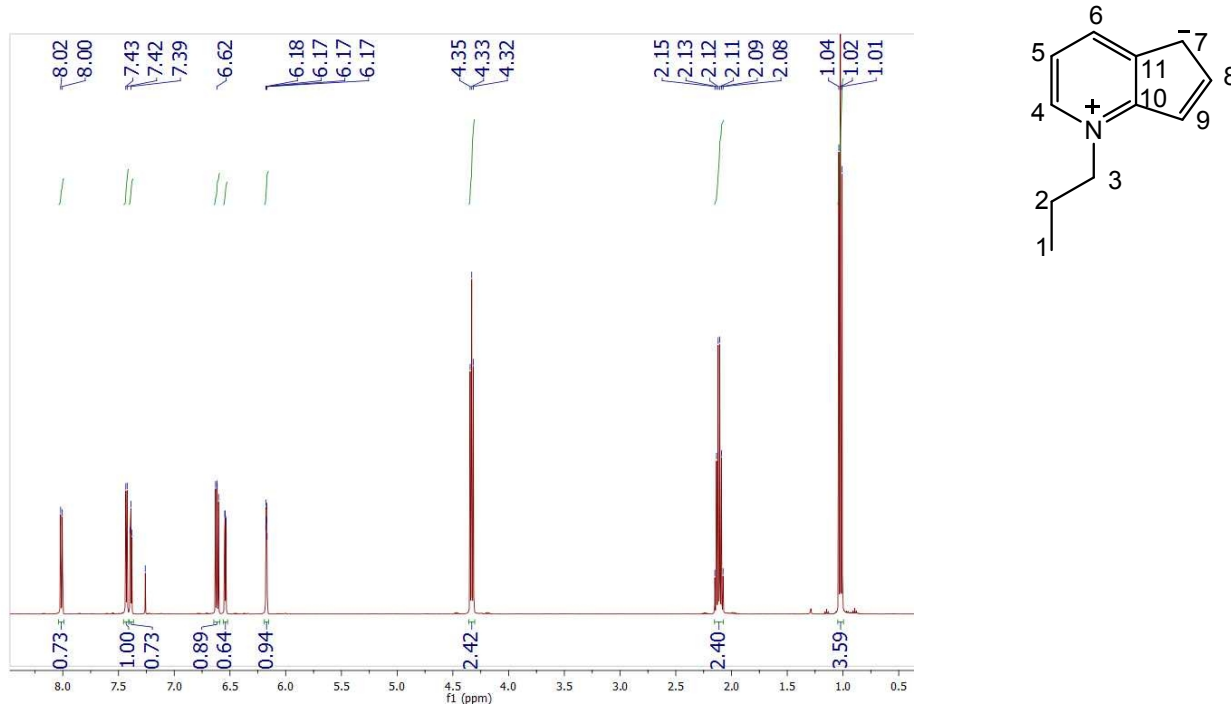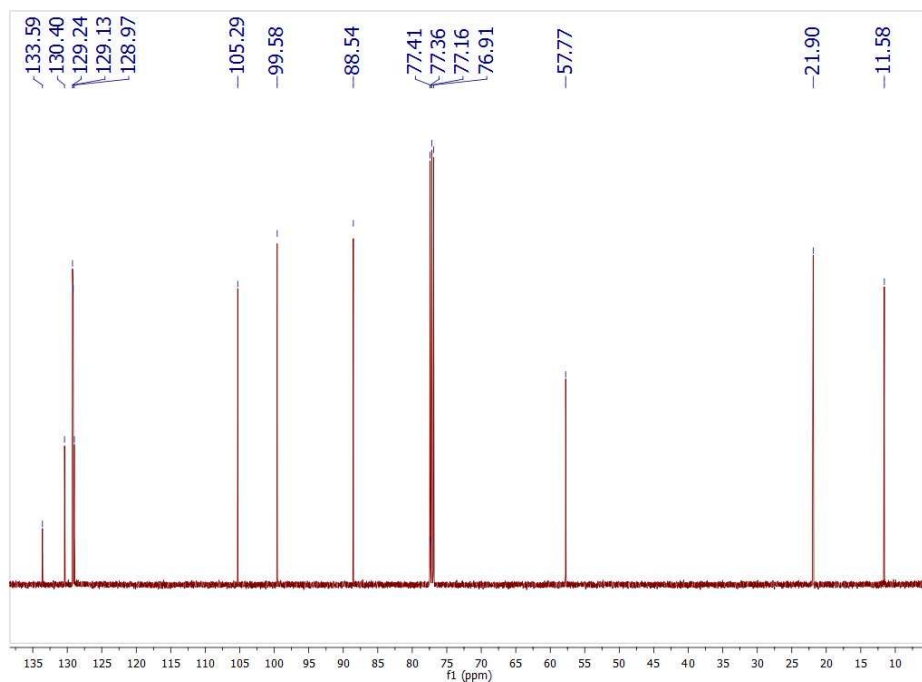



### Synthesis of 3:

A solution of **2** (11.6 mg in 0.1 mL of Et<sub>2</sub>O) was stirred under 10 atm of CO<sub>2</sub> at 22.6 °C in a Parr high pressure reactor for 15 h. Unreacted **2** was washed away with 5 mL of Et<sub>2</sub>O, yielding **3** as a yellow solid (11.0 mg, 74% yield). X-ray quality crystals of **3** were grown via slow evaporation of an Et<sub>2</sub>O solution of **3**. <sup>1</sup>H NMR (DMSO-d<sub>6</sub>, 500 MHz) δ: 11.02 (s, 1H, OH), 8.59 (d, J = 7.6 Hz, 1H, H6), 8.08 (d, J = 6.0 Hz, 1H, H4), 7.67 (d, J = 4.1 Hz, 1H, H8), 7.01 (dd, J = 7.6, 6.1 Hz, 1H, H5), 6.29 (d, J = 4.1 Hz, 1H, H9), 4.47 (t, J = 7.2 Hz, 2H, H3), 1.94 (qt, J = 7.4, 7.3 Hz, 2H, H2), 0.89 (t, J = 7.4 Hz, 3H, H1). <sup>13</sup>C NMR (DMSO-d<sub>6</sub>, 125 MHz) δ: 166.37(C12), 137.54(C10), 133.89(C8), 131.55(C4), 130.66(C6), 129.17(C11), 109.69(C5), 102.48(C7), 92.60(C9), 56.64(C3), 22.01(C2), 10.73(C1). Anal. calcd for C<sub>12</sub>H<sub>13</sub>NO<sub>2</sub>: C 70.93, H 6.40, N 6.89; found: C 70.45, H 6.31, N 6.65. IR(CDCl<sub>3</sub> solution): ν(C=O) 1628.84cm<sup>-1</sup>.

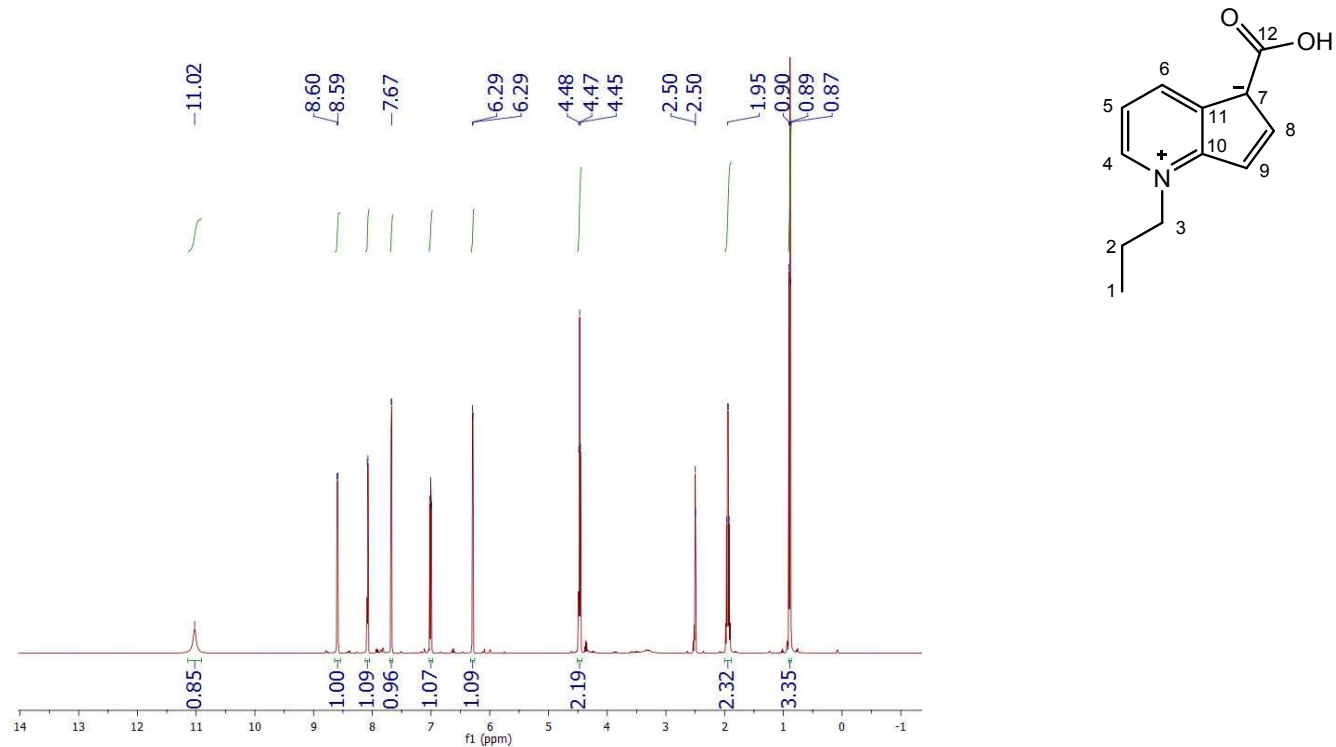

Figure S11. <sup>1</sup>H NMR spectrum of **3** in DMSO-d<sub>6</sub>. The peak at 11.02 ppm in the <sup>1</sup>H NMR spectrum corresponds to a carboxylic acid.

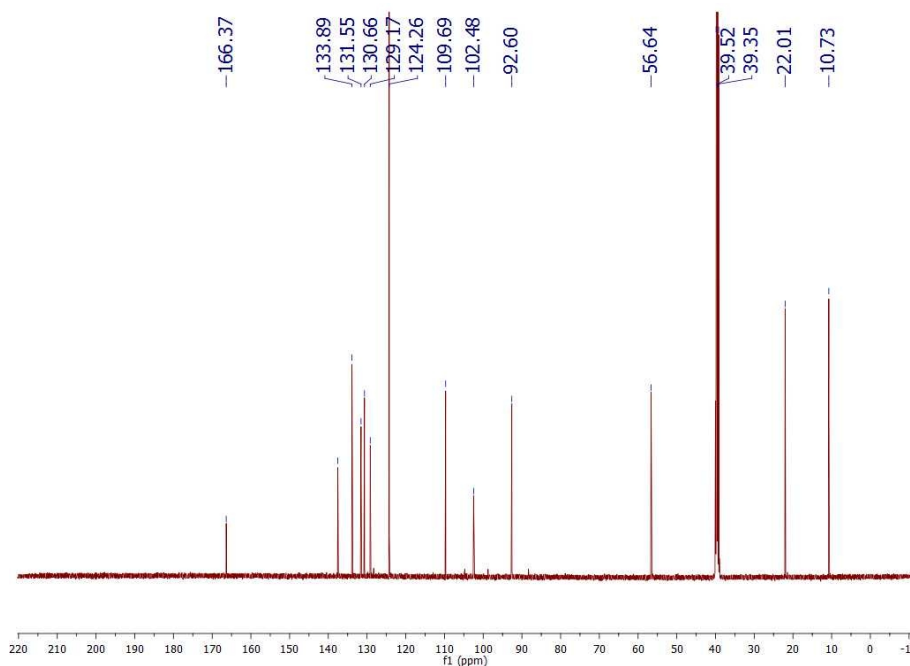

Figure S12. <sup>13</sup>C NMR spectrum of **3** in DMSO-d<sub>6</sub>. The <sup>13</sup>C NMR spectrum confirms the formation of a carboxylic acid species with a new peak a 166.37 ppm.

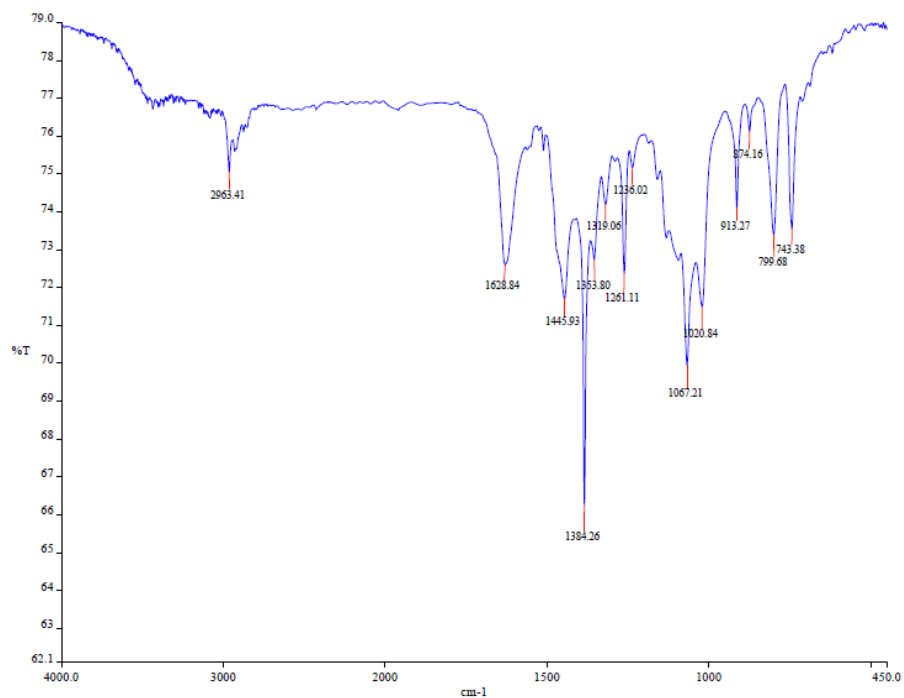

Figure S13. IR spectrum of **3** in  $\text{CDCl}_3$

#### Decomposition of **3** back to **2**:

In a J. Young NMR tube, a  $\text{CDCl}_3$  solution of **3** was heated under 1 atm of  $\text{N}_2$  at  $40^\circ\text{C}$  for 3.5 h. The  $^1\text{H}$  NMR spectrum showed over 90% of **3** decomposed back to **2**.

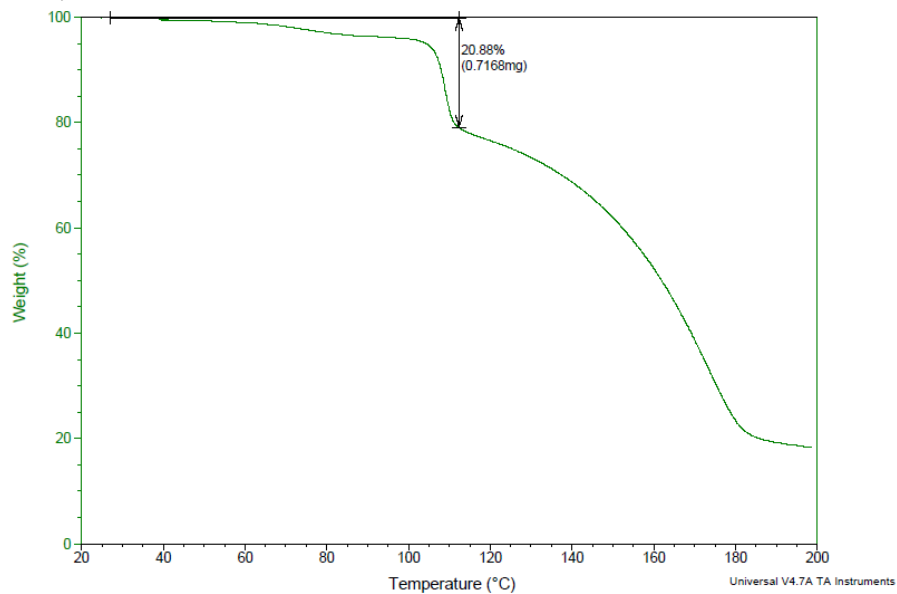

Figure S14. TGA trace of compound **3**. The 20.88% mass loss between  $40^\circ\text{C}$  and  $110^\circ\text{C}$  matches with the expected weight loss of 21.67%. TGA methods: 1. Ramp  $5^\circ\text{C}/\text{min}$  to  $40^\circ\text{C}$ ; 2. Isothermal at  $40^\circ\text{C}$  for 5 min; 3. Ramp  $5^\circ\text{C}/\text{min}$  to  $200^\circ\text{C}$ .

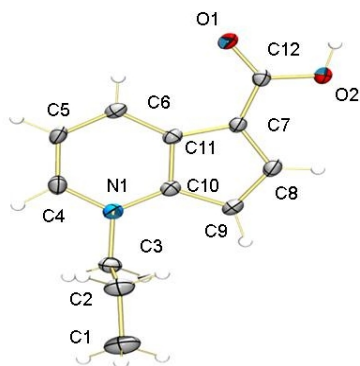

**Figure S15.** The molecular structure of **3**. Thermal ellipsoids are shown at 50% probability. Selected bond length[Å] and angles[°]: C7-C11, 1.427(2); C7-C8, 1.409(2); C7-C12, 1.424(2); O1-C12, 1.250(2); O2-C12, 1.338(2); N1-C4, 1.360(2); N1-C3, 1.477(2); N1-C10, 1.362(2); C11-C7-C8, 106.9(1); C11-C7-C12, 125.5(1); C8-C7-C12, 127.5(1).

**Table S1. Selected crystallographic data of 3:**

| <b>3</b>                                   |                                                                   |
|--------------------------------------------|-------------------------------------------------------------------|
| Formula                                    | C <sub>12</sub> H <sub>13</sub> NO <sub>2</sub>                   |
| FW                                         | 203.23                                                            |
| <i>T</i> (K)                               | 150(2)                                                            |
| space group                                | <i>P</i> 2 <sub>1</sub> / <i>c</i>                                |
| <i>a</i> (Å)                               | 9.1916(10)                                                        |
| <i>b</i> (Å)                               | 12.6389(14)                                                       |
| <i>c</i> (Å)                               | 9.1878(10)                                                        |
| ∠ (deg)                                    | 90                                                                |
| ∠ (deg)                                    | 100.210(6)                                                        |
| ∠ (deg)                                    | 90                                                                |
| <i>V</i> (Å <sup>3</sup> )                 | 1050.5(2)                                                         |
| <i>Z</i>                                   | 4                                                                 |
| <i>D<sub>c</sub></i> (g·cm <sup>-3</sup> ) | 1.363                                                             |
| ∠ (mm <sup>-1</sup> )                      | 0.441                                                             |
| no. of refln collected                     | 9133                                                              |
| no. of indept refln                        | 2412                                                              |
| GOF on <i>F</i> <sup>2</sup>               | 1.012                                                             |
| <i>R</i> [ <i>I</i> > 2σ( <i>I</i> )]      | <i>R</i> <sub>1</sub> = 0.0436<br><i>wR</i> <sub>2</sub> = 0.0979 |
| <i>R</i> (all data)                        | <i>R</i> <sub>1</sub> = 0.0802<br><i>wR</i> <sub>2</sub> = 0.1107 |

### Reaction between 9-BBN and $^{13}\text{CO}_2$ in the presence of catalyst **1** at 70 °C

In a  $\text{N}_2$ -filled glovebox 9-BBN dimer (69 mg, 0.282 mmol) was added into a J. Young NMR tube containing a solution of **1** (10.0 mg, 0.0549 mmol) in 0.6 mL of  $\text{C}_6\text{D}_5\text{Br}$ . The tube was treated by the "freeze pump" process once in liquid nitrogen and then immediately transferred to a  $-70\text{ }^\circ\text{C}$  dry ice/ $^i\text{PrOH}$  bath and opened to 1 atm of  $^{13}\text{CO}_2$  for 10 min to allow heat exchange, during which only the frozen solution-containing portion of the tube was immersed in the cold bath. The tube was then sealed and warmed up to room temperature and heated at  $70\text{ }^\circ\text{C}$  for 17 h. The conversion of 9-BBN to  $^{13}\text{CH}_2(\text{OBBN})_2$  and  $^{13}\text{CH}_3\text{OBBN}$  was monitored by  $^1\text{H}$  and  $^{11}\text{B}$  NMR.

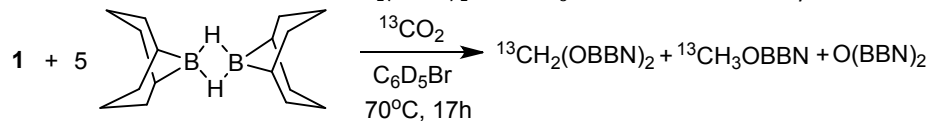

$^{13}\text{CH}_2(\text{OBBN})_2$ :  $^1\text{H}$  NMR ( $\text{C}_6\text{D}_5\text{Br}$ , 400 MHz)  $\delta$ : 5.46 (d,  $^1J_{\text{C-H}} = 164.6$  Hz,  $^{13}\text{CH}_2(\text{OBBN})_2$ ).  $^{13}\text{C}$  NMR ( $\text{C}_6\text{D}_5\text{Br}$ , 100 MHz)  $\delta$ : 85.56 (t,  $^1J_{\text{C-H}} = 164$  Hz,  $^{13}\text{CH}_2(\text{OBBN})_2$ ).

$^{13}\text{CH}_3\text{OBBN}$ :  $^1\text{H}$  NMR ( $\text{C}_6\text{D}_5\text{Br}$ , 400 MHz)  $\delta$ : 3.56 (d,  $^1J_{\text{C-H}} = 142.7$  Hz,  $^{13}\text{CH}_3\text{OBBN}$ ).  $^{13}\text{C}$  NMR ( $\text{C}_6\text{D}_5\text{Br}$ , 100 MHz)  $\delta$ : 52.80 (q,  $^1J_{\text{C-H}} = 142$  Hz,  $^{13}\text{CH}_3\text{OBBN}$ ).

The  $^{11}\text{B}$  NMR spectrum showed a broad singlet at 58.59 ppm.

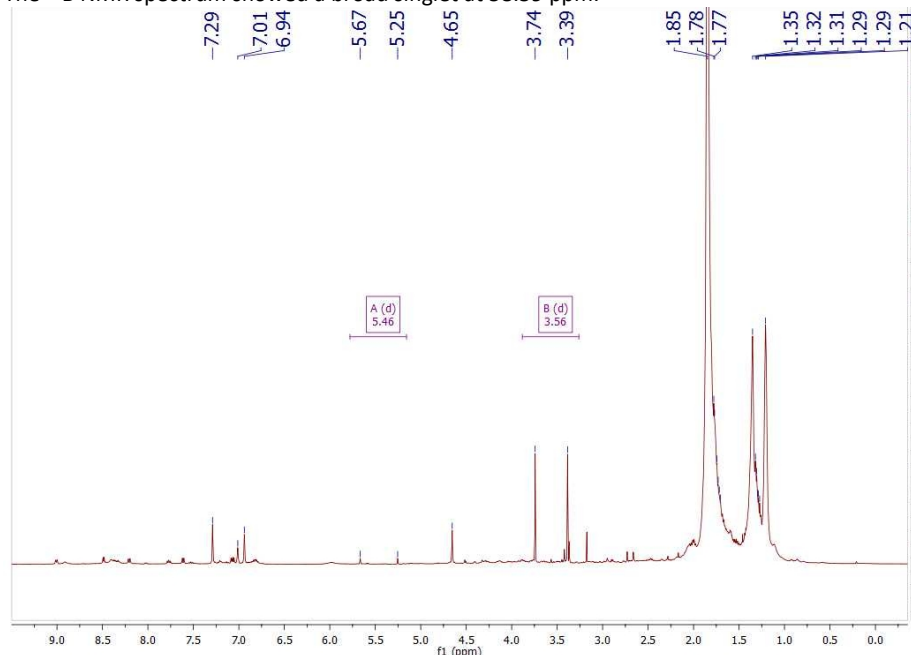

Figure S16.  $^1\text{H}$  NMR spectrum of the final reaction mixture above.

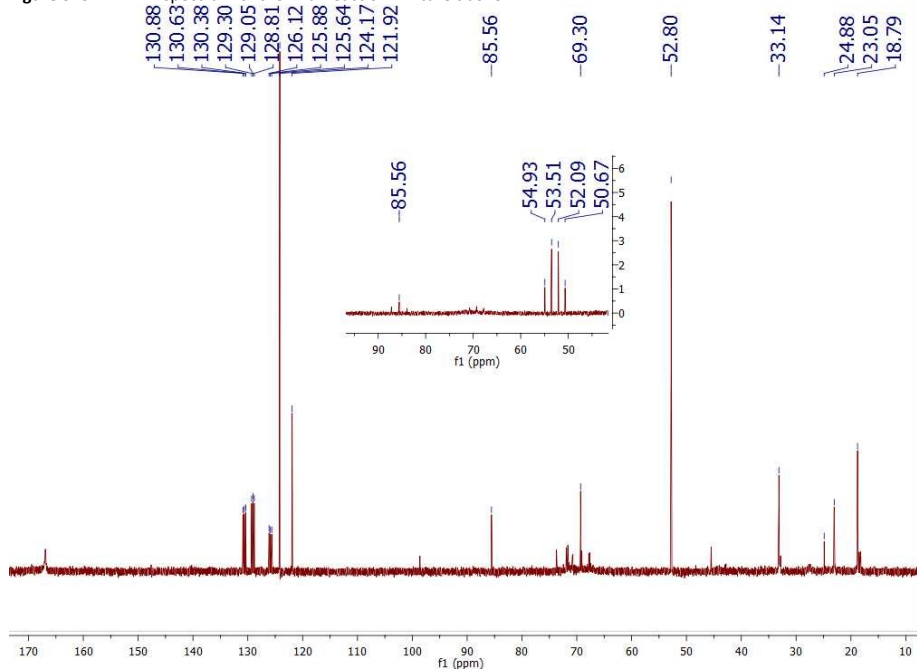

Figure S17.  $^{13}\text{C}$  NMR spectrum of the final reaction mixture above.

### Reaction between HBcat and $^{13}\text{CO}_2$ in the presence of catalyst **1** at 70 °C

In a  $\text{N}_2$ -filled glovebox, HBcat (28.3 mg, 70% purity, 0.165 mmol) was added into a J. Young NMR tube containing a solution of **1** (1.0 mg, 0.00549 mmol in 0.6 mL of  $\text{C}_6\text{D}_5\text{Br}$ ). The tube was treated by the “freeze pump” process once in liquid nitrogen and then immediately transferred to a  $-70\text{ }^\circ\text{C}$  dry ice/ $i$ PrOH bath and opened to 1 atm of  $^{13}\text{CO}_2$  for 10 min to allow heat exchange, during which only the frozen solution-containing portion of the tube was immersed in the cold bath. The tube was then sealed and warmed up to room temperature and heated at  $70\text{ }^\circ\text{C}$  for 2 h. The conversion of HBcat to  $^{13}\text{CH}_3\text{OBcat}$  was monitored by  $^1\text{H}$  and  $^{11}\text{B}$  NMR.

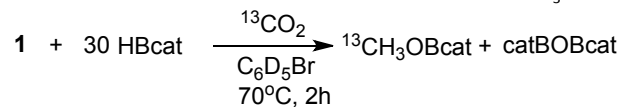

$^{13}\text{CH}_3\text{OBcat}$ :  $^1\text{H}$  NMR ( $\text{C}_6\text{D}_5\text{Br}$ , 400 MHz)  $\delta$ : 3.60 (d,  $^1J_{\text{C-H}} = 145.3\text{ Hz}$ ,  $^{13}\text{CH}_3\text{OBcat}$ );  $^{13}\text{C}$  NMR ( $\text{C}_6\text{D}_5\text{Br}$ , 100 MHz)  $\delta$ : 52.80 (q,  $^1J_{\text{C-H}} = 145\text{ Hz}$ ,  $^{13}\text{CH}_3\text{OBcat}$ ).

The  $^{11}\text{B}$  NMR spectrum showed a broad signal at 23.14 ppm.

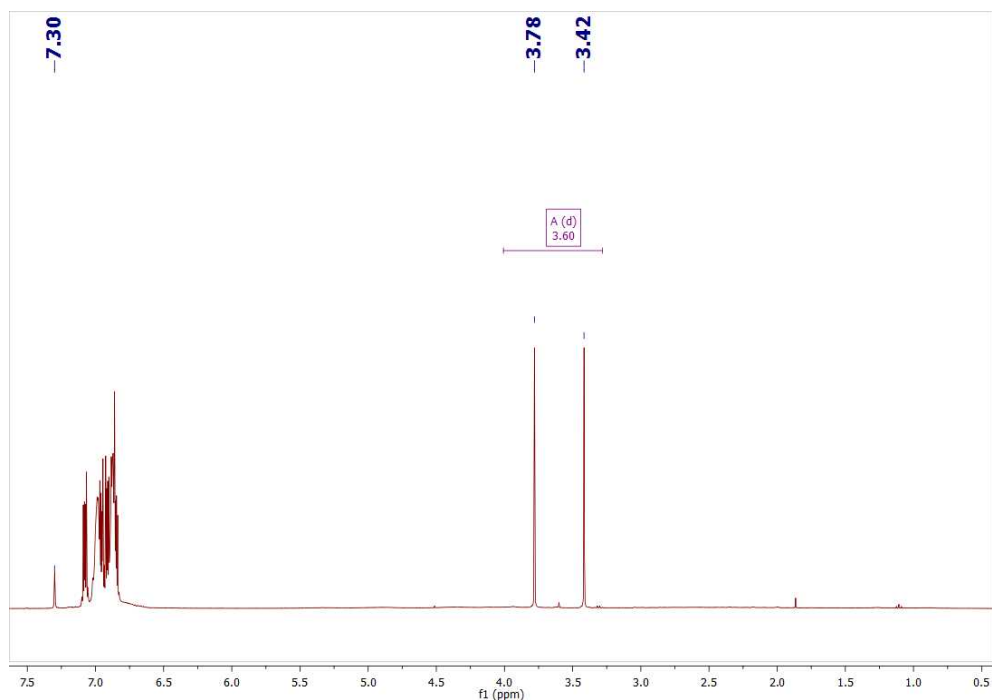

Figure S18.  $^1\text{H}$  NMR spectrum of the final reaction mixture above

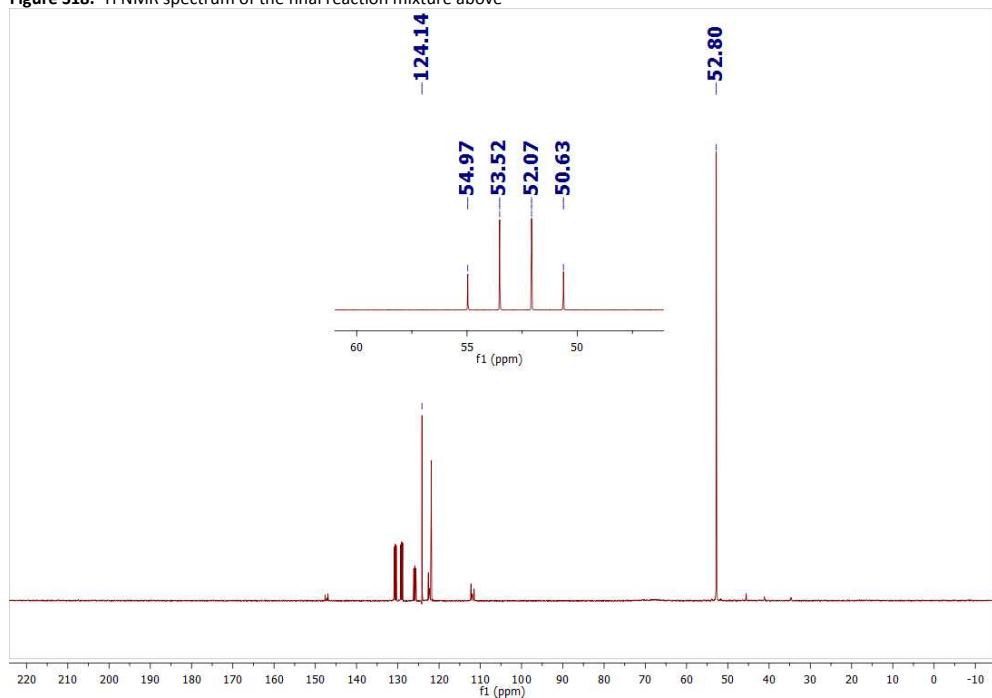

Figure S19.  $^{13}\text{C}$  NMR spectrum of the final reaction mixture above

### Reaction between 9-BBN and CO<sub>2</sub> in the presence of catalyst **1** at 25°C

In a N<sub>2</sub>-filled glovebox, 9-BBN dimer (67 mg, 0.274 mmol) was added into a 50 mL Schlenk bomb containing a solution of **1** (1.0 mg, 0.00549 mmol) in 0.6 mL of C<sub>6</sub>D<sub>5</sub>Br. The bomb was immersed in liquid N<sub>2</sub> to freeze the solution; the headspace was then evacuated. The entire bomb was then immersed in a -70°C dry ice-isopropanol bath to keep the solution frozen and cool the headspace. The bomb was then opened to 1 atm of CO<sub>2</sub> for 10 minutes to allow the temperature to equilibrate. Subsequently the bomb was sealed and allowed to warm to 25°C quickly to achieve ~1.5 atm pressure. The reaction mixture was stirred 25 °C for 8 h. It gradually changed from a dark blue solution to an orange suspension and finally to a light yellow suspension with white precipitates. The bomb was shipped into a N<sub>2</sub>-filled glovebox. After the release of CO<sub>2</sub> gas from the system, hexamethylbenzene (9.6 mg, 0.0593 mmol) was added to the mixture. The TON was calculated based on the integration of the products with respect to that of hexamethylbenzene in the <sup>1</sup>H NMR spectrum.

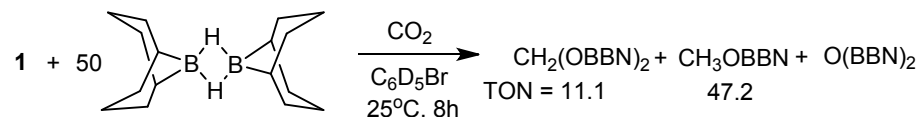

CH<sub>2</sub>(OBBN)<sub>2</sub>: <sup>1</sup>H NMR (C<sub>6</sub>D<sub>5</sub>Br, 400 MHz) δ: 5.46 (s, CH<sub>2</sub>(OBBN)<sub>2</sub>); <sup>13</sup>C NMR (C<sub>6</sub>D<sub>5</sub>Br, 100 MHz) δ: 85.56 (CH<sub>2</sub>(OBBN)<sub>2</sub>).  
CH<sub>3</sub>OBBN: <sup>1</sup>H NMR (C<sub>6</sub>D<sub>5</sub>Br, 400 MHz) δ: 3.58 (s, CH<sub>3</sub>OBBN), <sup>13</sup>C NMR (C<sub>6</sub>D<sub>5</sub>Br, 100 MHz) δ: 52.80 (CH<sub>3</sub>OBBN).

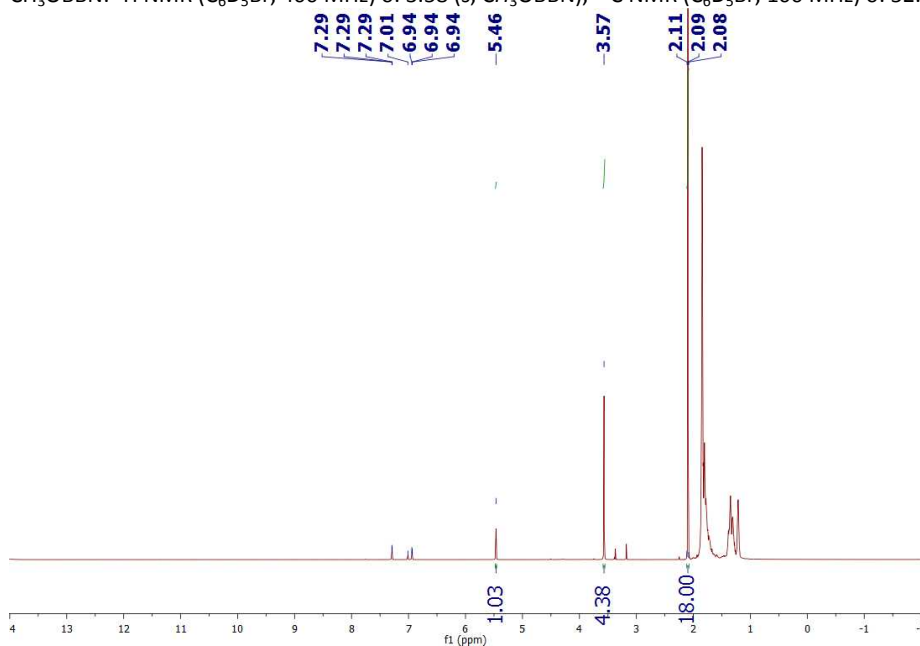

Figure S20. <sup>1</sup>H NMR spectrum of the final reaction mixture above.

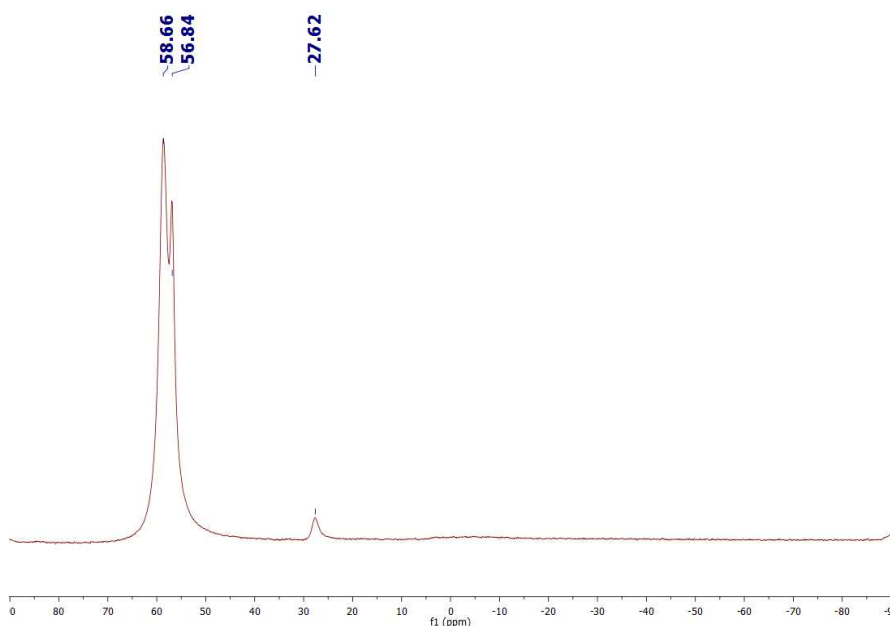

Figure S21. <sup>11</sup>B NMR spectrum of the final reaction mixture above.

### Reaction between 9-BBN and CO<sub>2</sub> in the presence of catalyst **1** at 70 °C

In a N<sub>2</sub>-filled glovebox, 9-BBN dimer (67 mg, 0.274 mmol) was added into a 50 mL Schlenk bomb containing a solution of **1** (1.0 mg, 0.00549 mmol) in 0.6 mL of C<sub>6</sub>D<sub>5</sub>Br. CO<sub>2</sub> was introduced using the same protocol as above. The reaction mixture was stirred at 70 °C for 2h. The bomb was shipped into a N<sub>2</sub>-filled glovebox. After cooling and the release of CO<sub>2</sub> gas from the system, hexamethylbenzene (11.8 mg, 0.0728 mmol) was added to the mixture. The TON was calculated based on the integration of the products with respect to that of hexamethylbenzene in the <sup>1</sup>H NMR spectrum.

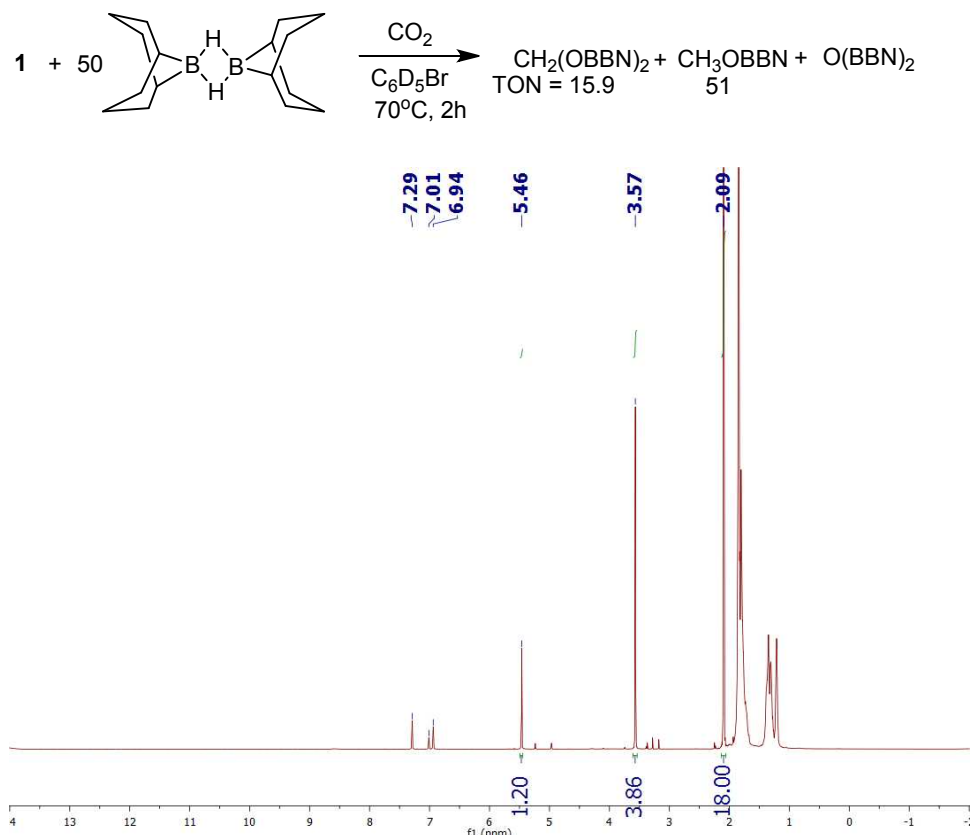

Figure S22. <sup>1</sup>H NMR spectrum of the final reaction mixture above

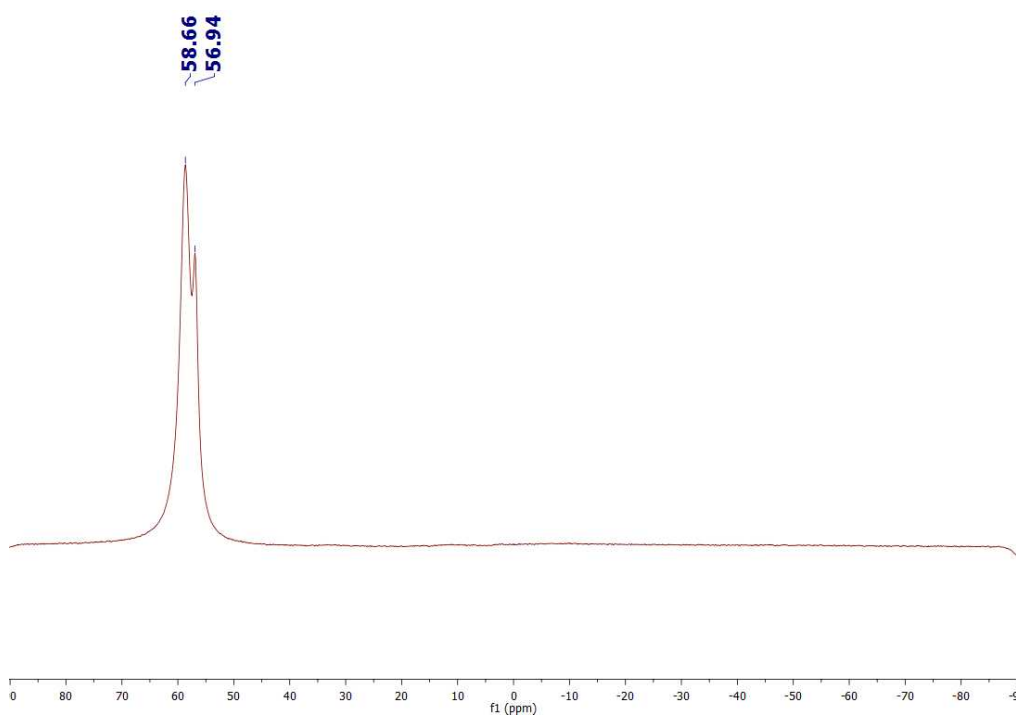

Figure S23. <sup>11</sup>B NMR spectrum of the final reaction mixture above

### Reaction between HBcat and CO<sub>2</sub> in the presence of catalyst 1 at 25°C

In a N<sub>2</sub>-filled glovebox, HBcat (94.7 mg, 69.6% purity, 0.549 mmol) was added into a 50 mL Schlenk bomb containing a solution of **1** (1.0 mg, 0.00549 mmol in 0.6 mL of C<sub>6</sub>D<sub>5</sub>Br). CO<sub>2</sub> was introduced using the same protocol as above. The reaction mixture was stirred at 25 °C for 6 h. It gradually changed from a dark brown solution to a light yellow suspension with white precipitates. After the release of CO<sub>2</sub> gas from the system, hexamethylbenzene (11.1 mg, 0.0685 mmol) was added to the mixture. The TON was calculated based on the integration of the product with respect to that of hexamethylbenzene in the <sup>1</sup>H NMR spectrum.

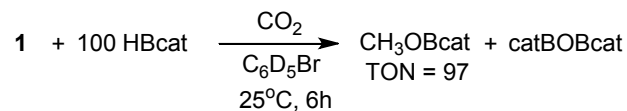

CH<sub>3</sub>OBcat: <sup>1</sup>H NMR (C<sub>6</sub>D<sub>5</sub>Br, 400 MHz) δ: 3.60 (s, CH<sub>3</sub>OBcat); <sup>13</sup>C NMR (C<sub>6</sub>D<sub>5</sub>Br, 100 MHz) δ: 52.80 (CH<sub>3</sub>OBcat).  
The <sup>11</sup>B NMR spectrum showed two broad signals at 23.26 and 22.47 ppm.

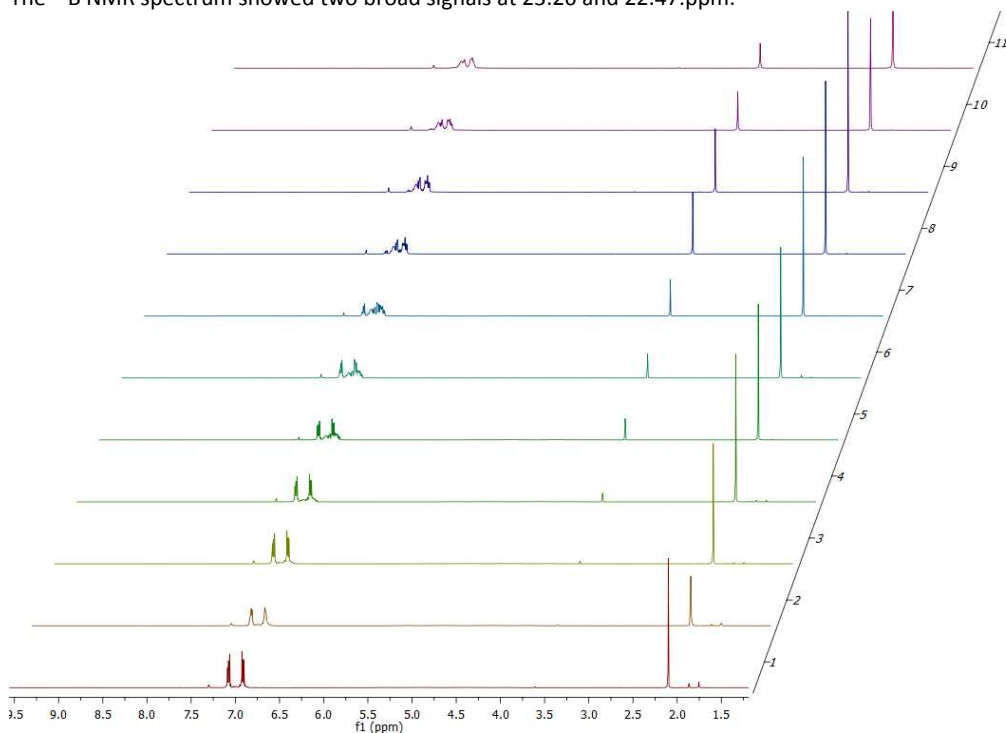

Figure S24. <sup>1</sup>H NMR spectra of the reaction mixture above from 5 min (bottom) to 6 h (top).

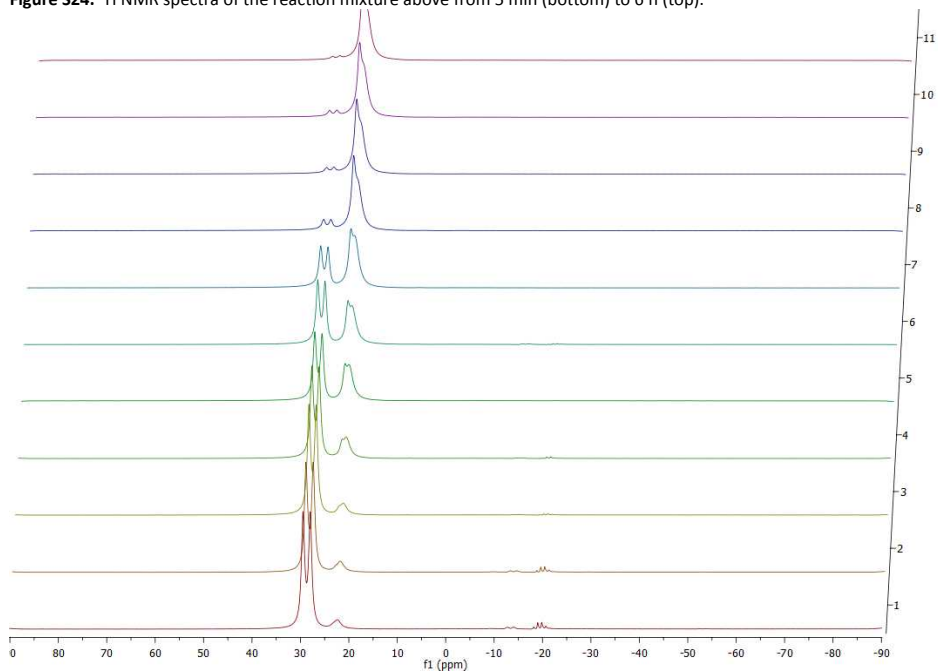

Figure S25. <sup>11</sup>B NMR spectrum of the reaction mixture above from 5 min (bottom) to 6 h (top)



### Reaction between HBcat and CO<sub>2</sub> in the presence of catalyst 1 at 70 °C

In a N<sub>2</sub>-filled glovebox, HBcat (101.2 mg, 65.2% purity, 0.549 mmol) was added into a 50 mL Schlenk bomb containing a solution of **1** (1.0 mg, 0.00549 mmol in 0.6 mL of C<sub>6</sub>D<sub>5</sub>Br). CO<sub>2</sub> was introduced using the same protocol as above. The reaction mixture was stirred at 70 °C for 2 h. The solution rapidly changed color from dark brown to light yellow. When the reaction mixture was cooled down to ambient temperature, a lot of white precipitate appeared. After the release of CO<sub>2</sub> gas from the system, hexamethylbenzene (0.1 mg, 0.0623 mmol) was added to the mixture. The conversion of HBcat to CH<sub>3</sub>OBcat was monitored by <sup>1</sup>H NMR and <sup>13</sup>B NMR. The TON was calculated based on the integration of the product with respect to that of hexamethylbenzene in the <sup>1</sup>H NMR spectrum.

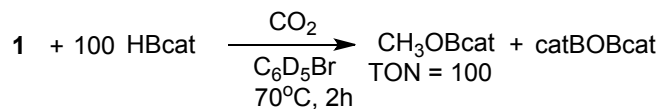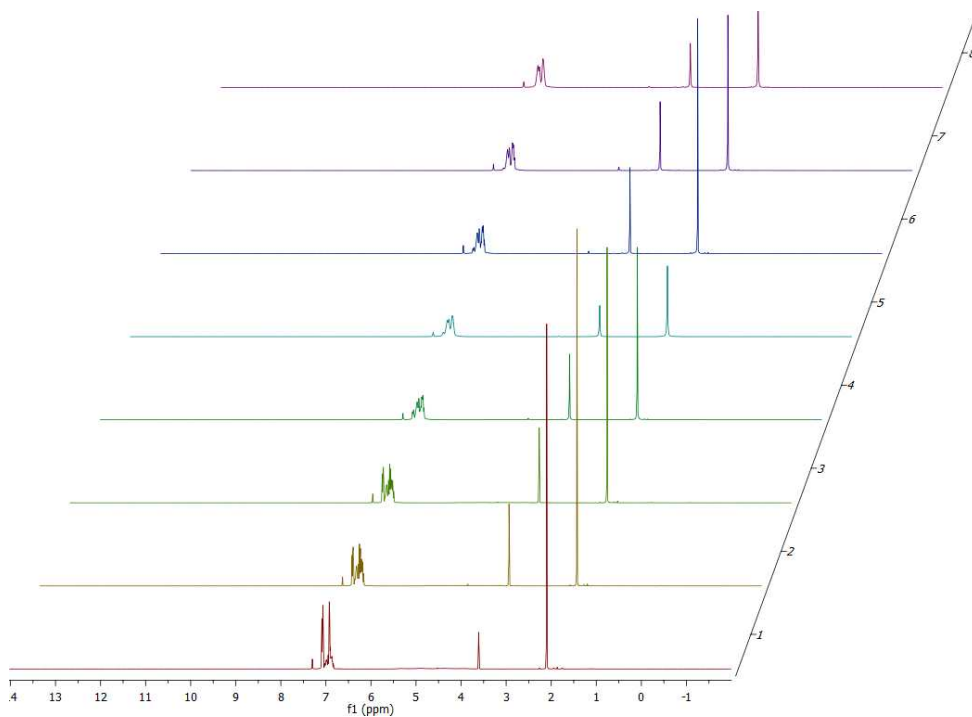

Figure S26. <sup>1</sup>H NMR spectrum of the reaction mixture above from 15 min (bottom) to 2 h (top)

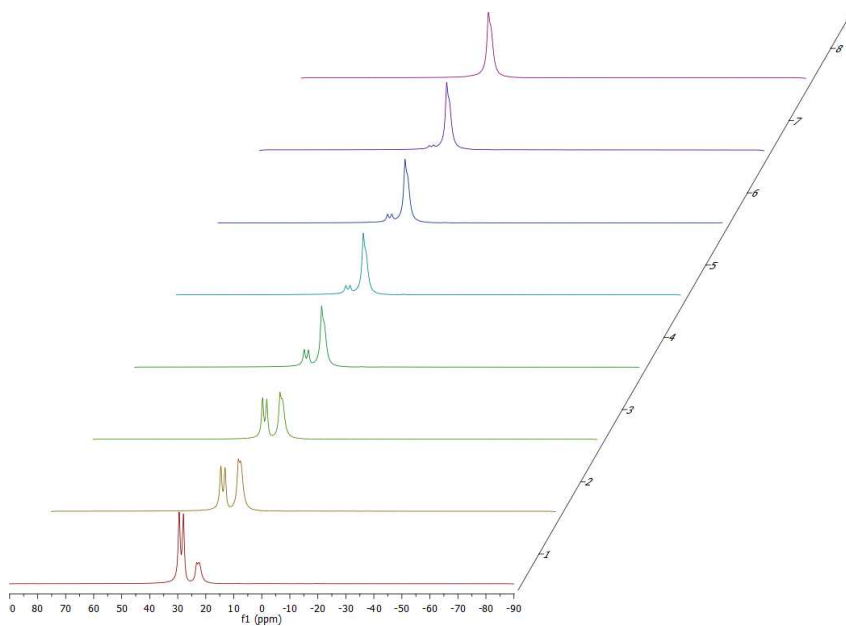

Figure S27. <sup>13</sup>B NMR spectrum of the reaction mixture above from 15 min (bottom) to 2 h (top)

### Reaction between HBcat and CO<sub>2</sub> in the presence of catalyst 1 at 70 °C

In a N<sub>2</sub>-filled glovebox, HBcat (99.9 mg, 65.9% purity, 0.549 mmol) was added into a 50 mL Schlenk bomb containing a solution of **1** (1.0 mg, 0.00549 mmol in 0.6 mL of C<sub>6</sub>D<sub>5</sub>Br). CO<sub>2</sub> was introduced using the same protocol as above. The reaction mixture was stirred at 70 °C for 2 h. The solution rapidly changed color from dark brown to light yellow. When the reaction mixture was cooled to ambient temperature, a lot of white precipitates appeared. After 21.5 h, another batch of HBcat (100.0 mg, 65.9% purity, 0.549 mmol) was added into the reaction mixture. CO<sub>2</sub> was introduced using the same protocol as above. The reaction mixture was again stirred at 70 °C for 3 h. After cooling and the release of CO<sub>2</sub> gas from the system, hexamethylbenzene (11.4 mg, 0.0704 mmol) was added. The TON was calculated based on the integration of the product with respect to that of hexamethylbenzene in the <sup>1</sup>H NMR spectrum.

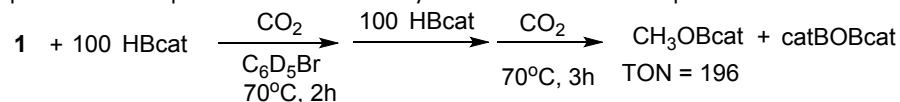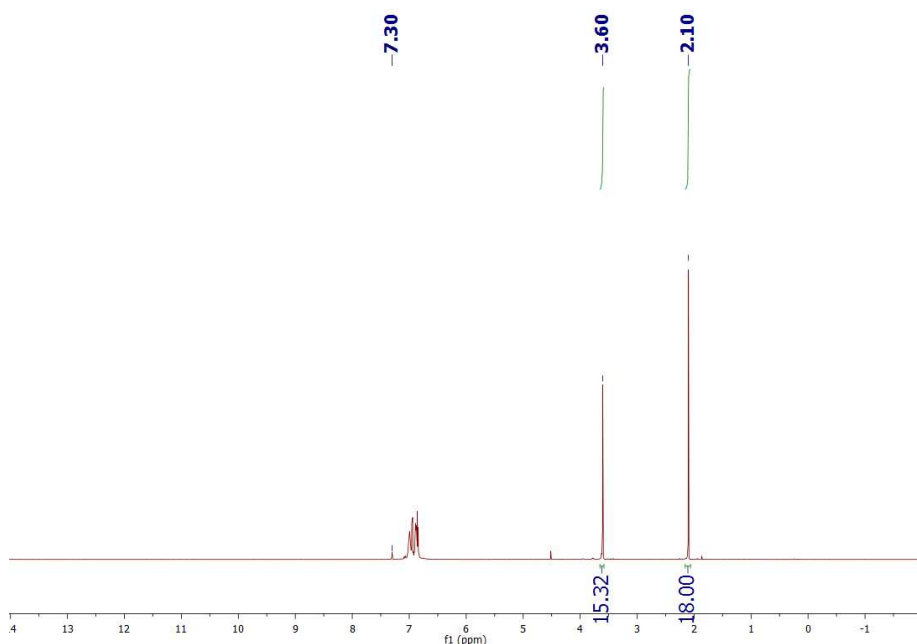

Figure S28. <sup>1</sup>H NMR spectrum of the final reaction mixture above

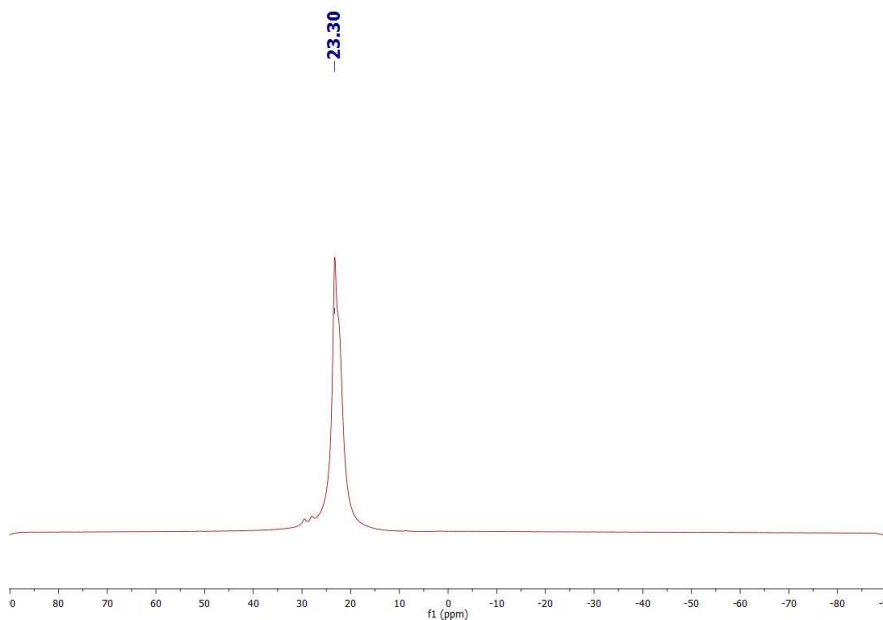

Figure S29. <sup>11</sup>B NMR spectrum of the final reaction mixture above

### Reaction between HBpin and CO<sub>2</sub> in the presence of catalyst **1** at 100 °C

In a N<sub>2</sub>-filled glovebox, HBpin (70.3 mg, 0.549 mmol) was added into a 50 mL Schlenk bomb containing a solution of **1** (1.0 mg, 0.00549 mmol) in 0.6 mL of CDCl<sub>3</sub>. CO<sub>2</sub> was introduced using the same protocol as above. The reaction mixture was stirred at 100 °C for 48 h. The solution gradually changed color from dark blue to red and finally brown. After cooling and the release of CO<sub>2</sub> gas from the system, hexamethylbenzene (11.9 mg, 0.0734 mmol) was added to the mixture. The TON was calculated based on the integration of the product with respect to that of hexamethylbenzene in the <sup>1</sup>H NMR spectrum.

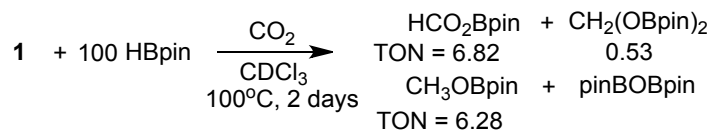

HCO<sub>2</sub>Bpin: <sup>1</sup>H NMR (CDCl<sub>3</sub>, 400 MHz) δ: 8.42 (s, HCO<sub>2</sub>Bpin)

CH<sub>2</sub>(OBpin)<sub>2</sub>: <sup>1</sup>H NMR (CDCl<sub>3</sub>, 400 MHz) δ: 5.24 (s, CH<sub>2</sub>(OBpin)<sub>2</sub>)

CH<sub>3</sub>OBpin: <sup>1</sup>H NMR (CDCl<sub>3</sub>, 400 MHz) δ: 3.60 (s, CH<sub>3</sub>OBpin)

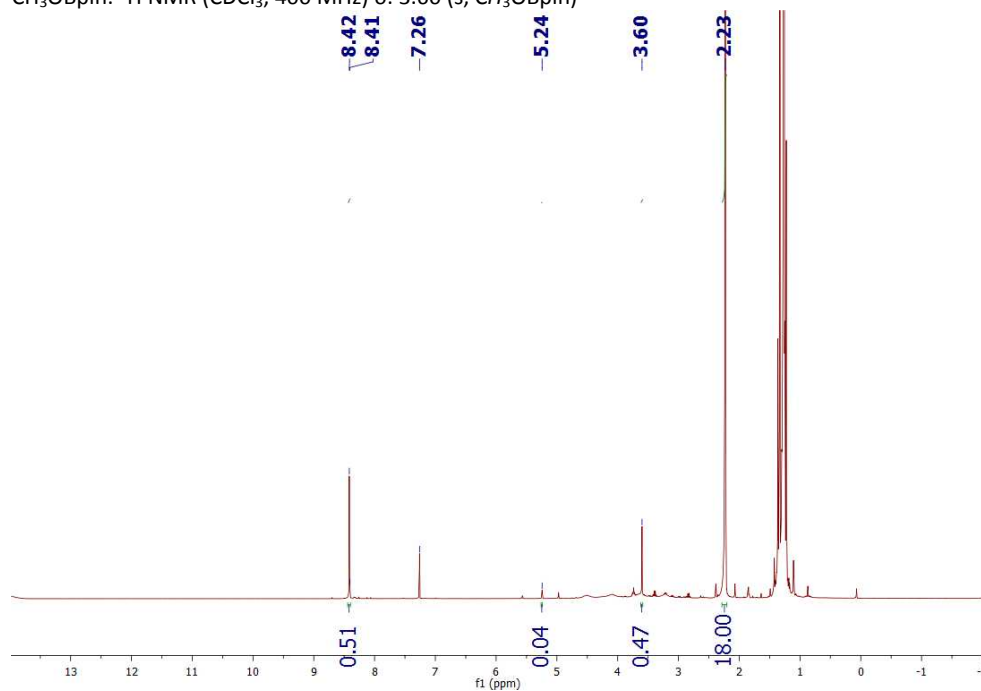

Figure S30. <sup>1</sup>H NMR spectrum of the final reaction mixture above

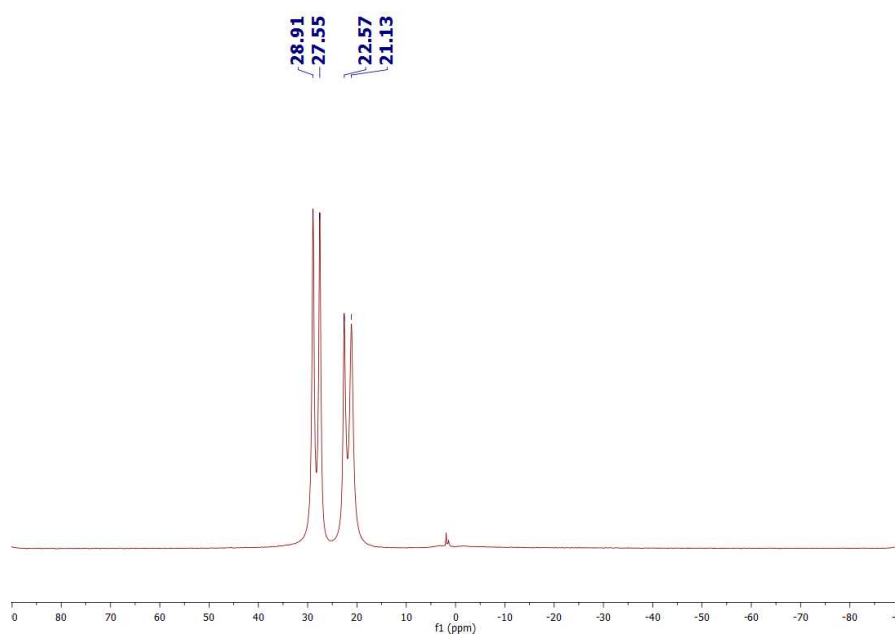

Figure S31. <sup>11</sup>B NMR spectrum of the final reaction mixture above

### Reaction between $\text{BH}_3\cdot\text{SMe}_2$ and $\text{CO}_2$ in the presence of catalyst **1** at $25^\circ\text{C}$

In a  $\text{N}_2$ -filled glovebox, a solution of  $\text{BH}_3\cdot\text{SMe}_2$  (2.0 M in THF, 0.33 mL, 0.66 mmol) was added into a 50 mL Schlenk bomb containing a solution of **1** (1.2 mg, 0.00659 mmol in 0.6 mL of  $\text{C}_6\text{D}_6$ ).  $\text{CO}_2$  was introduced using the same protocol as above. The reaction mixture was stirred at  $25^\circ\text{C}$  for 44 h. After the release of  $\text{CO}_2$  gas from the system, hexamethylbenzene (0.9 mg, 0.0056 mmol) was added to the mixture. The TON was calculated based on the integration of the product with respect to that of hexamethylbenzene in the  $^1\text{H}$  NMR spectrum.

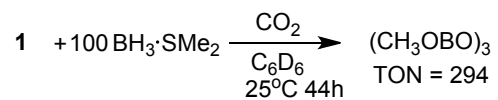

$(\text{CH}_3\text{OBO})_3$ :  $^1\text{H}$  NMR ( $\text{C}_6\text{D}_6$ , 400 MHz)  $\delta$ : 3.39 (s,  $(\text{CH}_3\text{OBO})_3$ );  $^{13}\text{C}$  NMR ( $\text{C}_6\text{D}_6$ , 100 MHz)  $\delta$ : 51.34 ( $(\text{CH}_3\text{OBO})_3$ ).

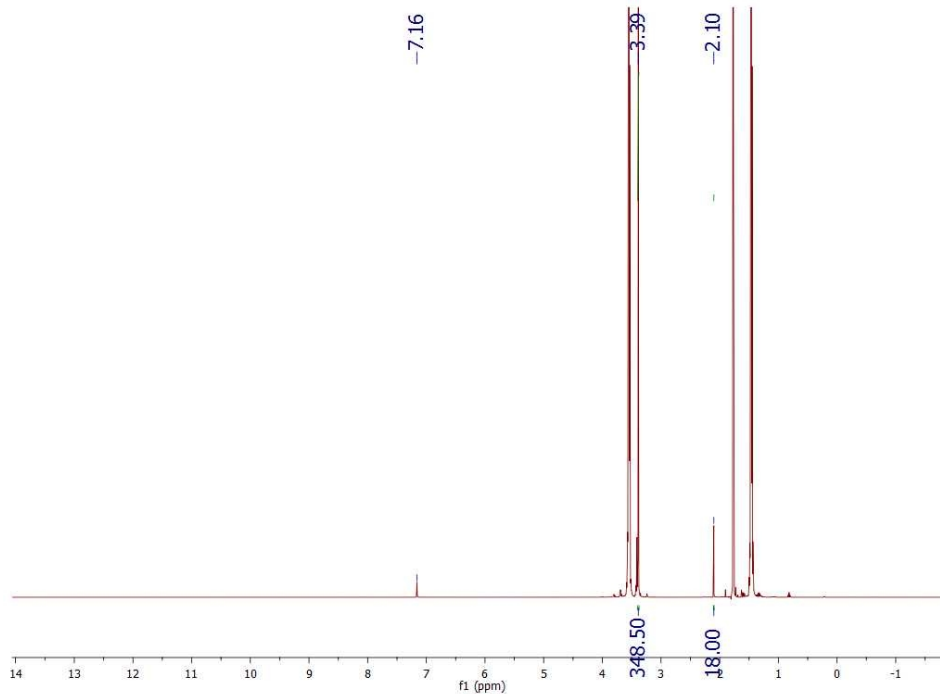

Figure S32.  $^1\text{H}$  NMR spectrum of the final reaction mixture above

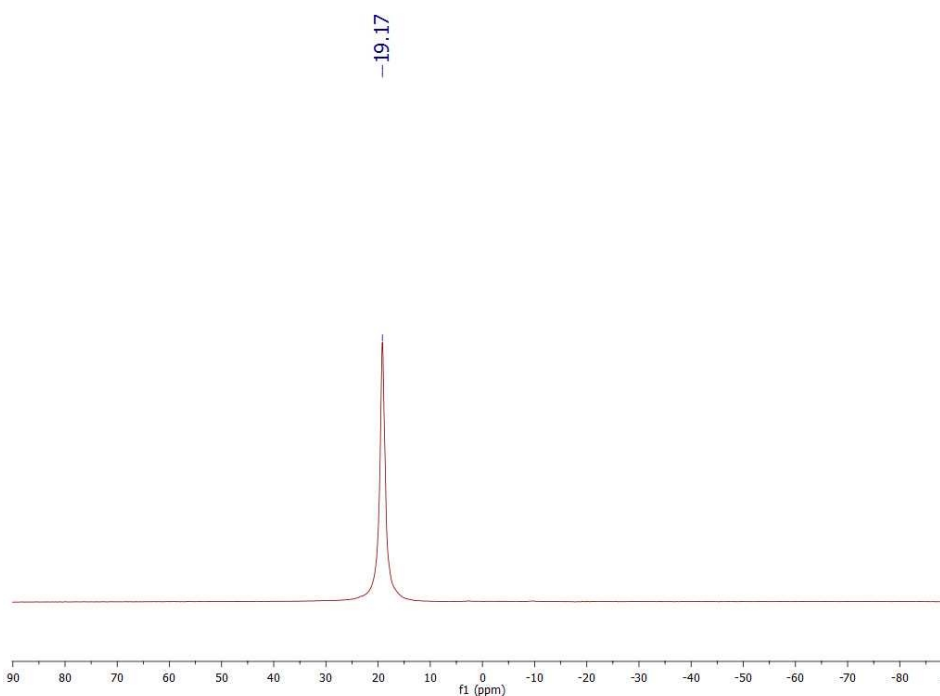

Figure S33.  $^{13}\text{C}$  NMR spectrum of the final reaction mixture above

### Reaction between $\text{BH}_3\cdot\text{SMe}_2$ and $\text{CO}_2$ in the presence of catalyst **1** at 70 °C

In a  $\text{N}_2$ -filled glovebox, a solution of  $\text{BH}_3\cdot\text{SMe}_2$  (2.0 M in THF, 0.275 mL, 0.549 mmol) was added into a 50 mL Schlenk bomb containing a solution of **1** (1.0 mg, 0.00549 mmol in 0.6 mL of  $\text{CDCl}_3$ ).  $\text{CO}_2$  was introduced using the same protocol as above. The reaction mixture was stirred at 70 °C for 20.5 h. After cooling and the release of  $\text{CO}_2$  gas from the system, hexamethylbenzene (1.0 mg, 0.0062 mmol) was added to the mixture. The TON was calculated based on the integration of the product with respect to that of hexamethylbenzene in the  $^1\text{H}$  NMR spectrum.

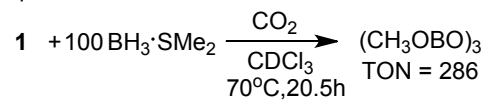

$(\text{CH}_3\text{OBO})_3$ :  $^1\text{H}$  NMR ( $\text{CDCl}_3$ , 400 MHz)  $\delta$ : 3.51 (s,  $(\text{CH}_3\text{OBO})_3$ )

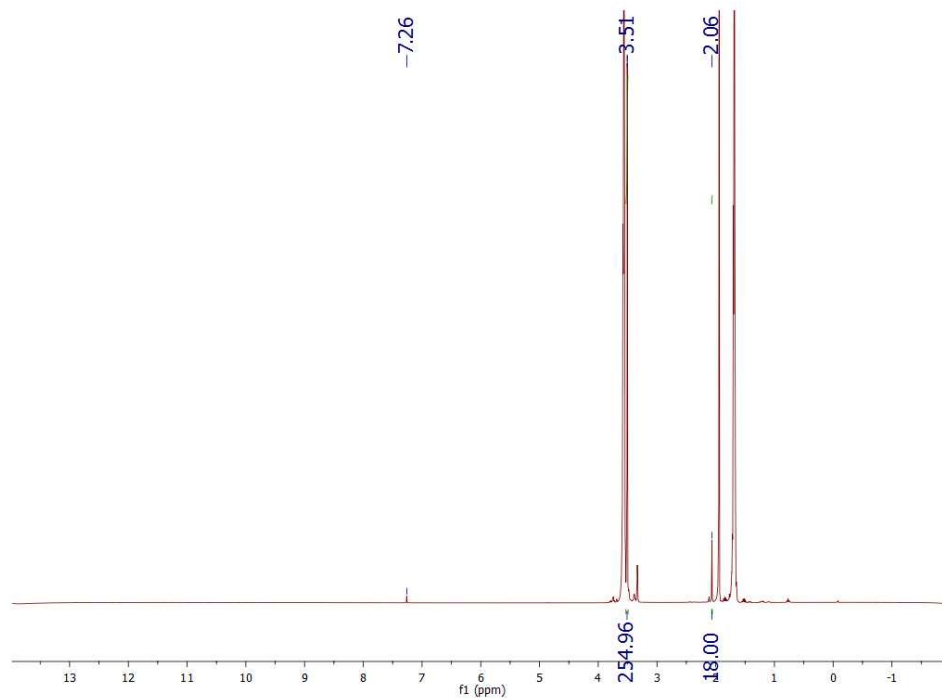

Figure S34.  $^1\text{H}$  NMR spectrum of the final reaction mixture above

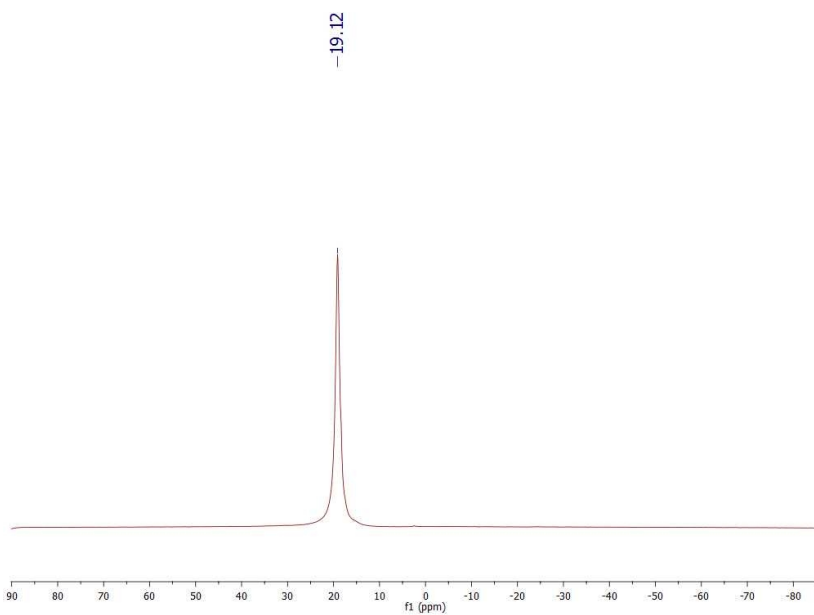

Figure S35.  $^{11}\text{B}$  NMR spectrum of the final reaction mixture above

### Reaction between 9-BBN and CO<sub>2</sub> in the presence of catalyst **2** at 25°C

In a N<sub>2</sub>-filled glovebox, 9-BBN dimer (76.8 mg, 0.315 mmol) was added into a 50 mL Schlenk bomb containing a solution of **2** (1.0 mg, 0.00629 mmol) in 0.3 mL of CDCl<sub>3</sub>. CO<sub>2</sub> was introduced using the same protocol as above. The reaction mixture was stirred at 25 °C for 19 h. The bomb was shipped into a N<sub>2</sub>-filled glovebox. After releasing CO<sub>2</sub> gas from the system, hexamethylbenzene (13.0 mg, 0.0802 mmol) was then added to the reaction mixture. The TON was calculated based on the integration of the product with respect to that of hexamethylbenzene in the <sup>1</sup>H NMR spectrum.

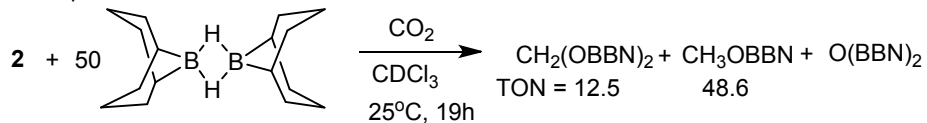

CH<sub>2</sub>(OBBN)<sub>2</sub>: <sup>1</sup>H NMR (CDCl<sub>3</sub>, 600 MHz) δ: 5.57 (s, CH<sub>2</sub>(OBBN)<sub>2</sub>); <sup>13</sup>C NMR (CDCl<sub>3</sub>, 150 MHz) δ: 86.39 (CH<sub>2</sub>(OBBN)<sub>2</sub>).  
CH<sub>3</sub>OBBN: <sup>1</sup>H NMR (CDCl<sub>3</sub>, 600 MHz) δ: 3.77 (s, CH<sub>3</sub>OBBN); <sup>13</sup>C NMR (CDCl<sub>3</sub>, 150 MHz) δ: 53.73 (CH<sub>3</sub>OBBN).

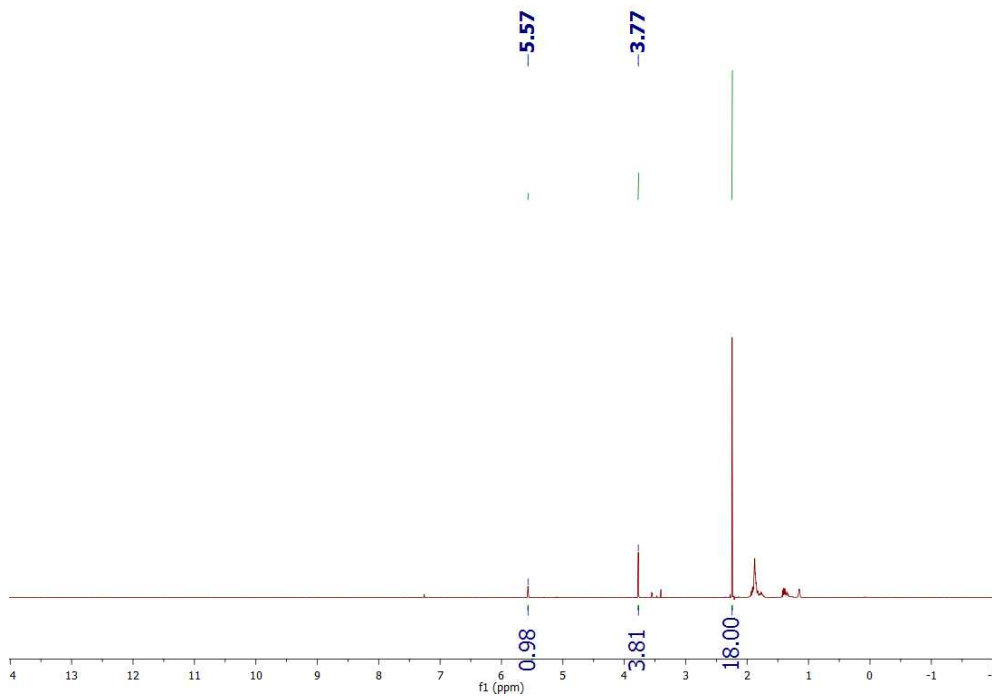

Figure S36. <sup>1</sup>H NMR spectrum of the final reaction mixture above

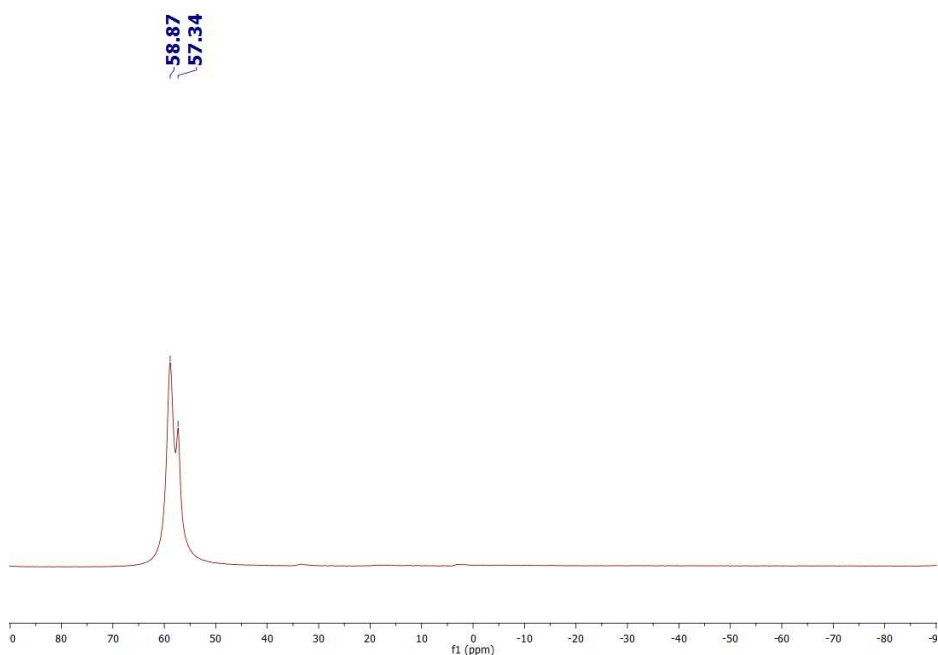

Figure S37. <sup>11</sup>B NMR spectrum of the final reaction mixture above.

### Reaction between 9-BBN and CO<sub>2</sub> in the presence of catalyst **2** at 70 °C

In a N<sub>2</sub>-filled glovebox, 9-BBN dimer (76.8 mg, 0.315 mmol) was added into a 50 mL Schlenk bomb containing a solution of **2** (1.0 mg, 0.00629 mmol) in 0.3 mL of CDCl<sub>3</sub>. CO<sub>2</sub> was introduced using the same protocol as above. The reaction mixture was stirred at 70 °C for 2 h. The bomb was shipped into a N<sub>2</sub>-filled glovebox. After cooling and releasing CO<sub>2</sub> gas from the system, hexamethylbenzene (14.2 mg, 0.00876 mmol) was added to the mixture. The TON was calculated based on the integration of the product with respect to that of hexamethylbenzene in the <sup>1</sup>H NMR spectrum.

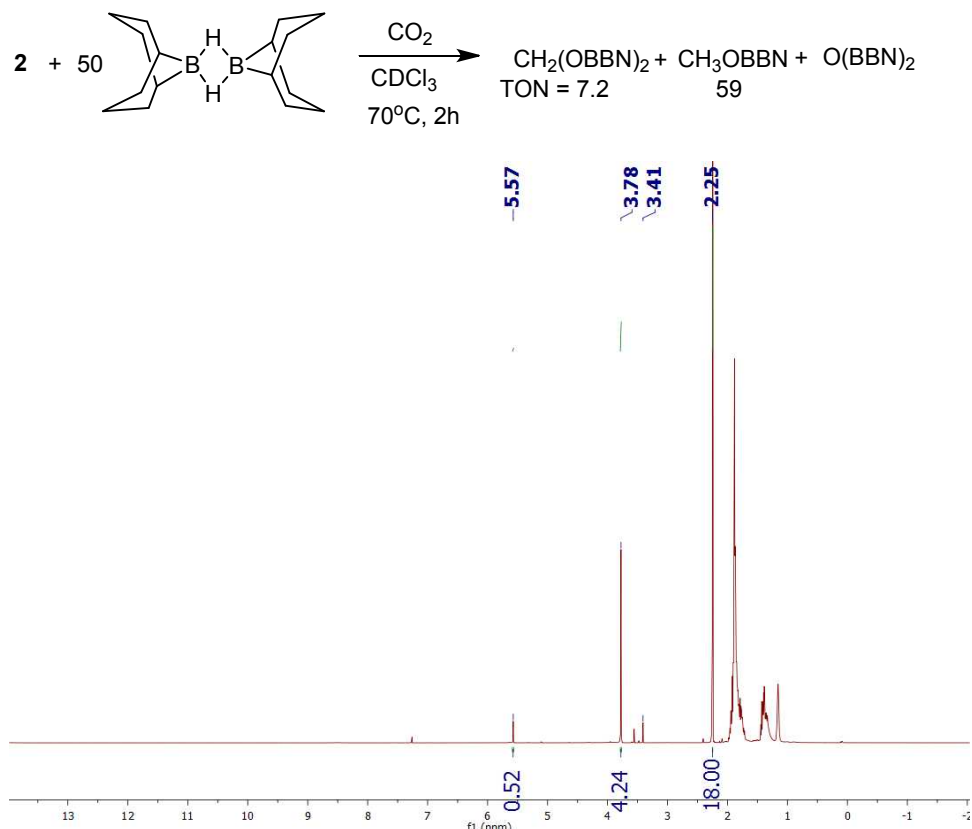

Figure S38. <sup>1</sup>H NMR spectrum of the final reaction mixture above

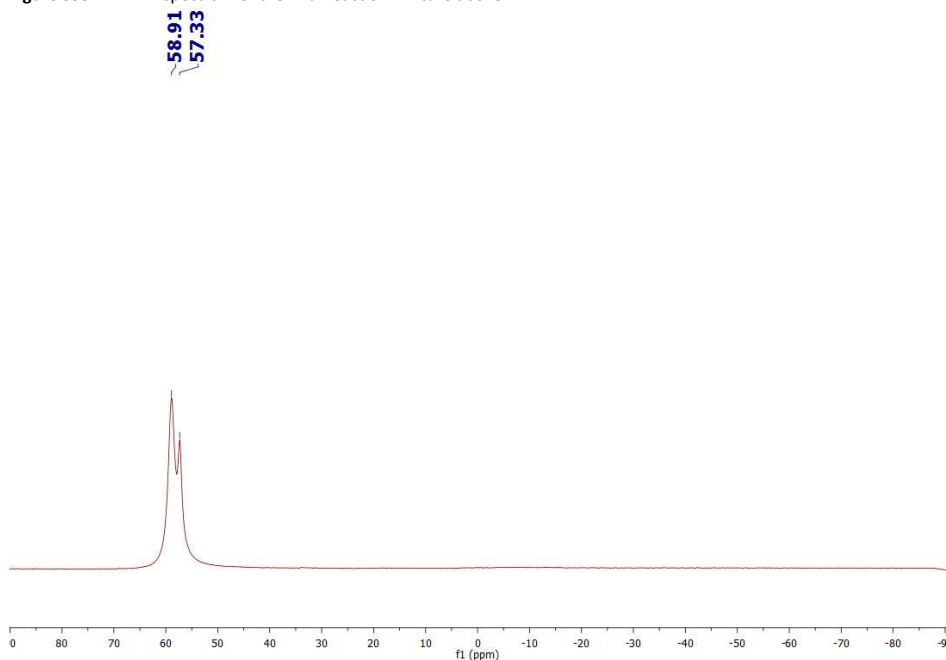

Figure S39. <sup>11</sup>B NMR spectrum of the final reaction mixture above

### Reaction between HBcat and CO<sub>2</sub> in the presence of catalyst **2** at 25°C

In a N<sub>2</sub>-filled glovebox, HBcat (107.0 mg, 70.5% purity, 0.629 mmol) was added into a 50 mL Schlenk bomb containing a solution of **2** (1.0 mg, 0.00629 mmol in 0.3 mL of CDCl<sub>3</sub>). CO<sub>2</sub> was introduced using the same protocol as above. The reaction mixture was stirred at 25 °C for 19 h. After the release of CO<sub>2</sub> gas from the system, hexamethylbenzene (16.3mg, 0.100 mmol) was added to the mixture. The TON was calculated based on the integration of the product with respect to that of hexamethylbenzene in the <sup>1</sup>H NMR spectrum.

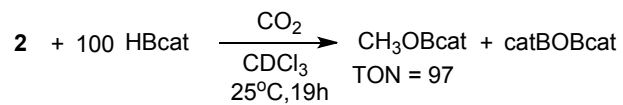

CH<sub>3</sub>OBcat: <sup>1</sup>H NMR (CDCl<sub>3</sub>, 600MHz) δ: 3.90 (s, CH<sub>3</sub>OBcat); <sup>13</sup>C NMR (CDCl<sub>3</sub>, 150 MHz) δ: 53.67 (CH<sub>3</sub>OBcat).

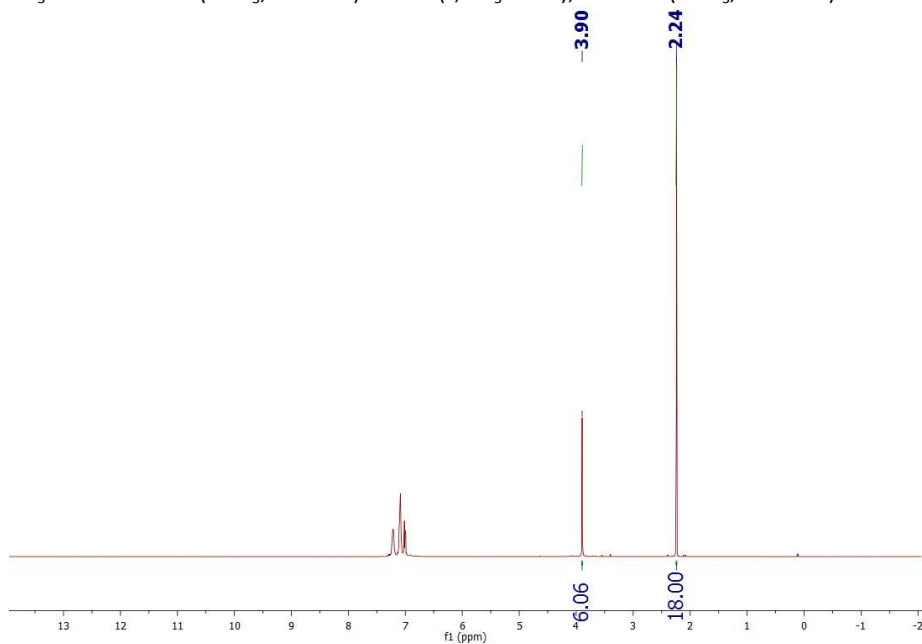

Figure S40. <sup>1</sup>H NMR spectrum of the final reaction mixture above

29.69  
28.16  
23.42  
22.41

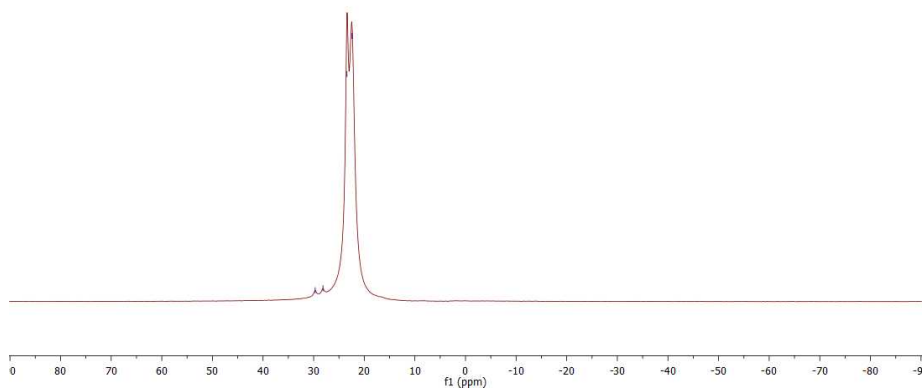

Figure S41. <sup>13</sup>C NMR spectrum of the final reaction mixture above



### Reaction between HBpin and CO<sub>2</sub> in the presence of catalyst **2** at 90 °C

In a N<sub>2</sub>-filled glovebox, HBpin (81.1 mg, 0.629 mmol) was added into a 50 mL Schlenk bomb containing a solution of **2** (1.0 mg, 0.00629 mmol) in 0.3 mL of CDCl<sub>3</sub>. CO<sub>2</sub> was introduced using the same protocol as above. The reaction mixture was stirred at 90 °C for 46 h. After cooling and the release of CO<sub>2</sub> gas from the system, hexamethylbenzene (13.8 mg, 0.0852 mmol) was added to the mixture. The TON was calculated based on the integration of the product with respect to that of hexamethylbenzene in the <sup>1</sup>H NMR spectrum.

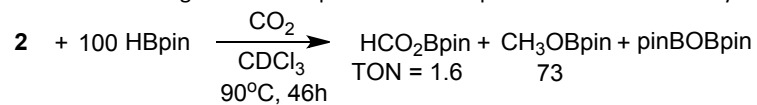

HCO<sub>2</sub>Bpin: <sup>1</sup>H NMR (CDCl<sub>3</sub>, 600 MHz) δ: 8.42 (s, HCO<sub>2</sub>Bpin); <sup>13</sup>C NMR (CDCl<sub>3</sub>, 150 MHz) δ: 158.04 (HCO<sub>2</sub>Bpin).

CH<sub>3</sub>OBpin: <sup>1</sup>H NMR (CDCl<sub>3</sub>, 600 MHz) δ: 3.59 (s, CH<sub>3</sub>OBpin); <sup>13</sup>C NMR (CDCl<sub>3</sub>, 150 MHz) δ: 52.71 (CH<sub>3</sub>OBpin).

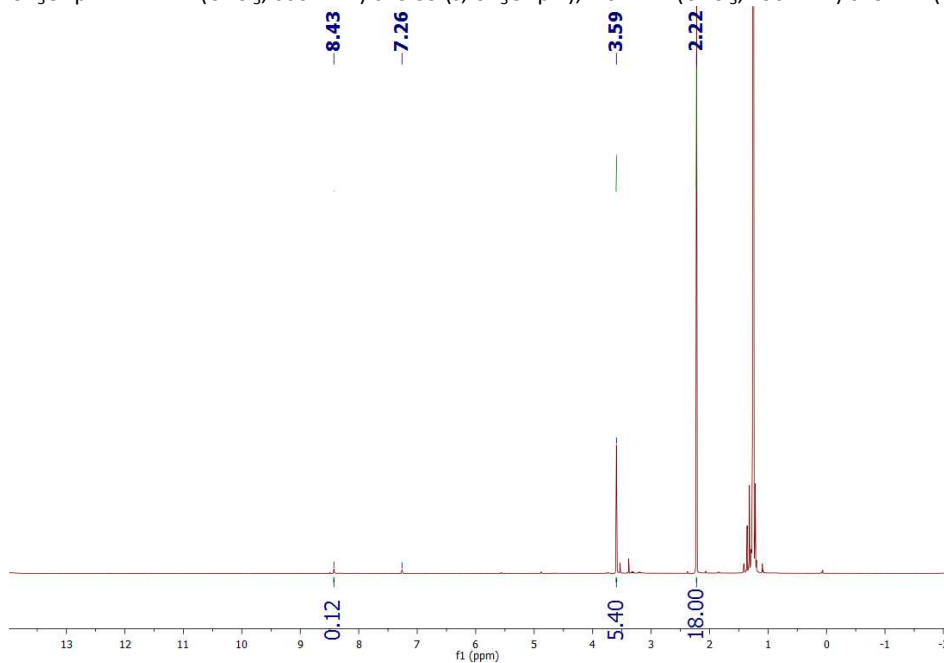

Figure S42. <sup>1</sup>H NMR spectrum of the final reaction mixture above

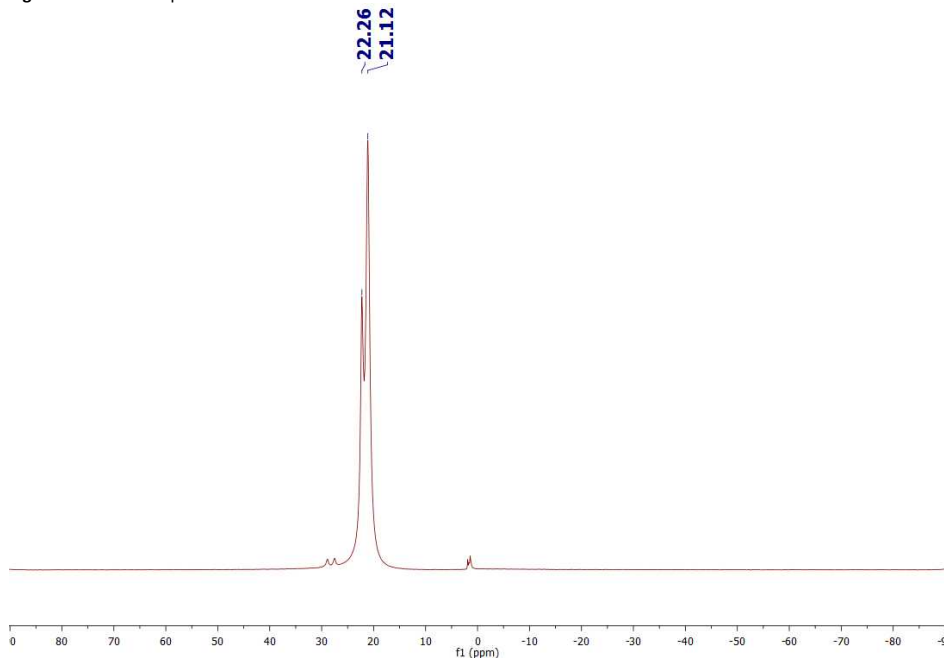

Figure S43. <sup>13</sup>B NMR spectrum of the final reaction mixture above

### Reaction between BH<sub>3</sub>·SMe<sub>2</sub> and CO<sub>2</sub> in the presence of catalyst **2** at 25 °C

In a N<sub>2</sub>-filled glovebox, a solution of BH<sub>3</sub>·SMe<sub>2</sub> (2.0 M in THF, 0.31 mL, 0.629 mmol) was added into a 50 mL Schlenk bomb containing a solution of **2** (1.0 mg, 0.00629 mmol in 0.4 mL of CDCl<sub>3</sub>). CO<sub>2</sub> was introduced using the same protocol as above. The reaction mixture was stirred at 25 °C for 7 h. After the release of CO<sub>2</sub> gas from the system, hexamethylbenzene (17.4 mg, 0.107 mmol) was added to the mixture. The TON was calculated based on the integration of the product with respect to that of hexamethylbenzene in the <sup>1</sup>H NMR spectrum.

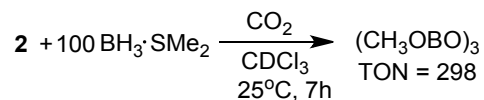

(CH<sub>3</sub>OBO)<sub>3</sub>: <sup>1</sup>H NMR (CDCl<sub>3</sub>, 600 MHz) δ: 3.27 (s, (CH<sub>3</sub>OBO)<sub>3</sub>); <sup>13</sup>C NMR (CDCl<sub>3</sub>, 150 MHz) δ: 50.57 ((CH<sub>3</sub>OBO)<sub>3</sub>).

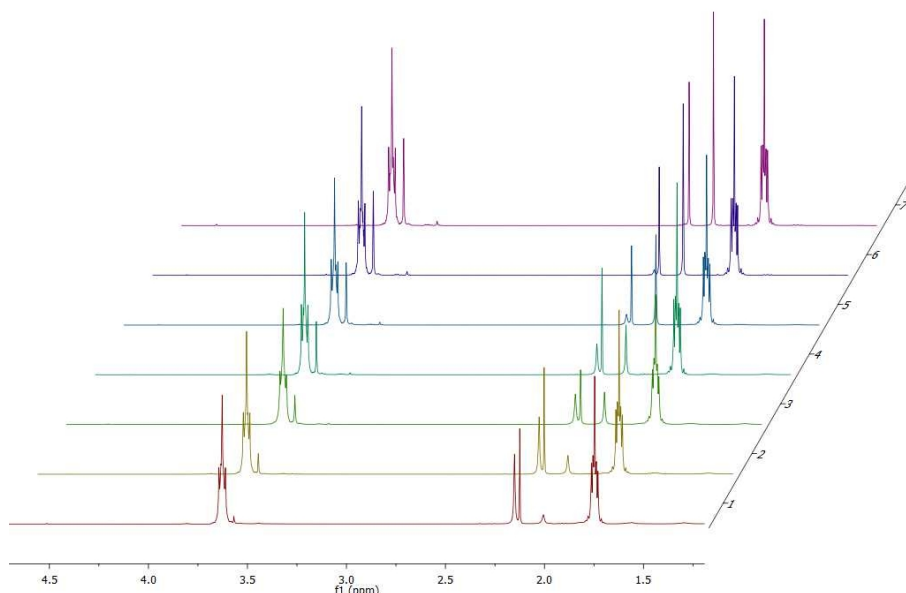

Figure S44. <sup>1</sup>H NMR spectra of the reaction mixture above from 1 h (bottom) to 7 h (top).

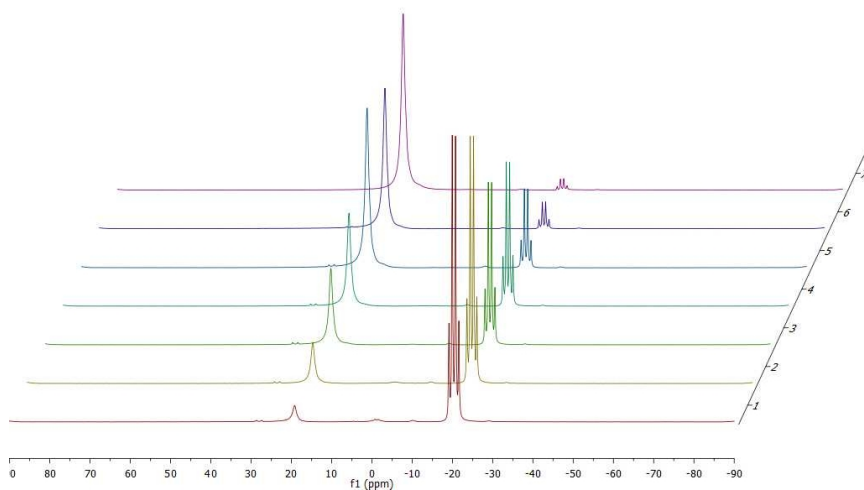

Figure S45. <sup>11</sup>B NMR spectrum of the reaction mixture above from 1 h (bottom) to 7 h (top).

### Reference

- 1 V. T. Annibale, D. Song, *J. Am. Chem. Soc.*, **2013**, *135*, 161750-16183.
- 2 C. S. Giam and D. Ambrotich, *J. Chem. Soc., Chem. Commun.*, **1984**, *5*, 265-266.
